# Supplementary material for: In Vitro Anti-Proliferative, and Kinase Inhibitory Activity of Phenanthroindolizidine Alkaloids Isolated from Tylophora indica
Source: MDPI journal article supplement (doi:10.3390/plants11101295), 2022-05-12

Aurora B kinase in complex with the specific inhibitor Barasertib

Resolution: 1.49 Å

Co-crystalline ligand (Leu99, Gln145, Ala233, Glu171 & Lys122)

Lys180, Val107, Gly100, Gly176, Glu177, Leu223, Lys103, Glu141

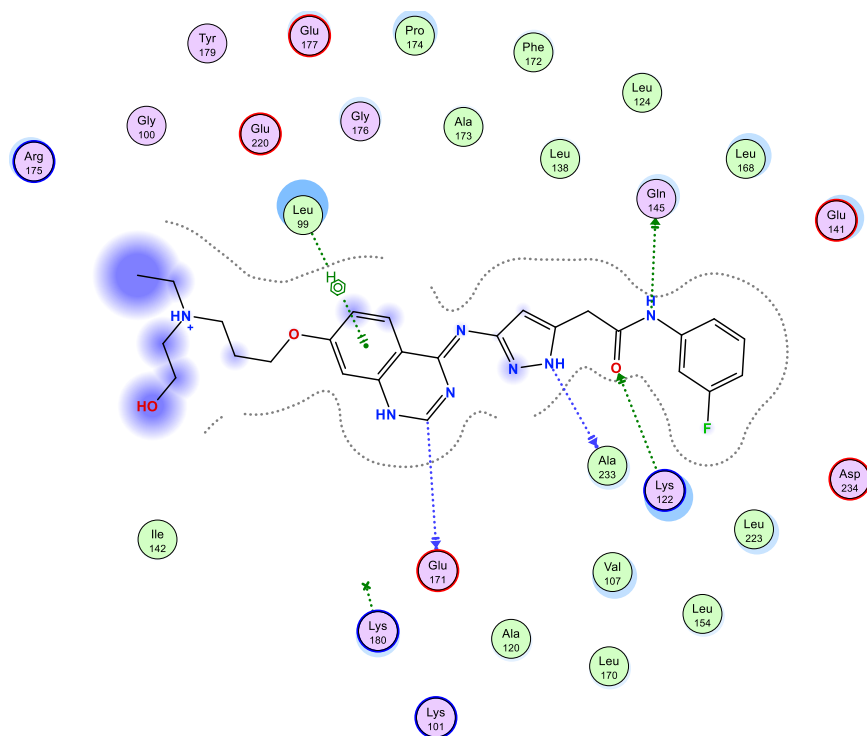

**Tylophorine: (Compound 1, pose 2, -7.27822351)**

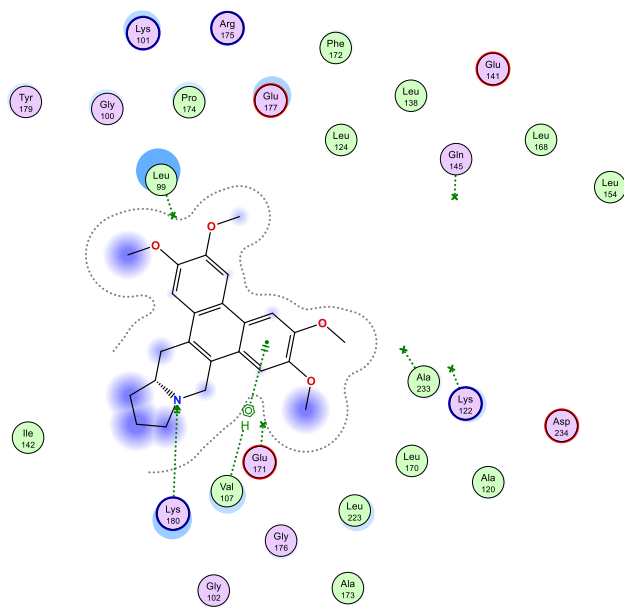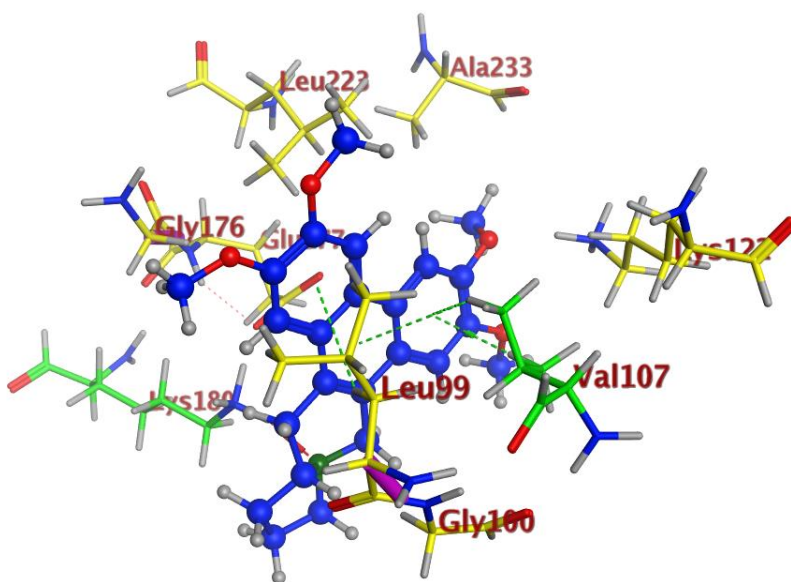

**Tylophorinicine: (Compound 2, pose 8, -6.75901651)**

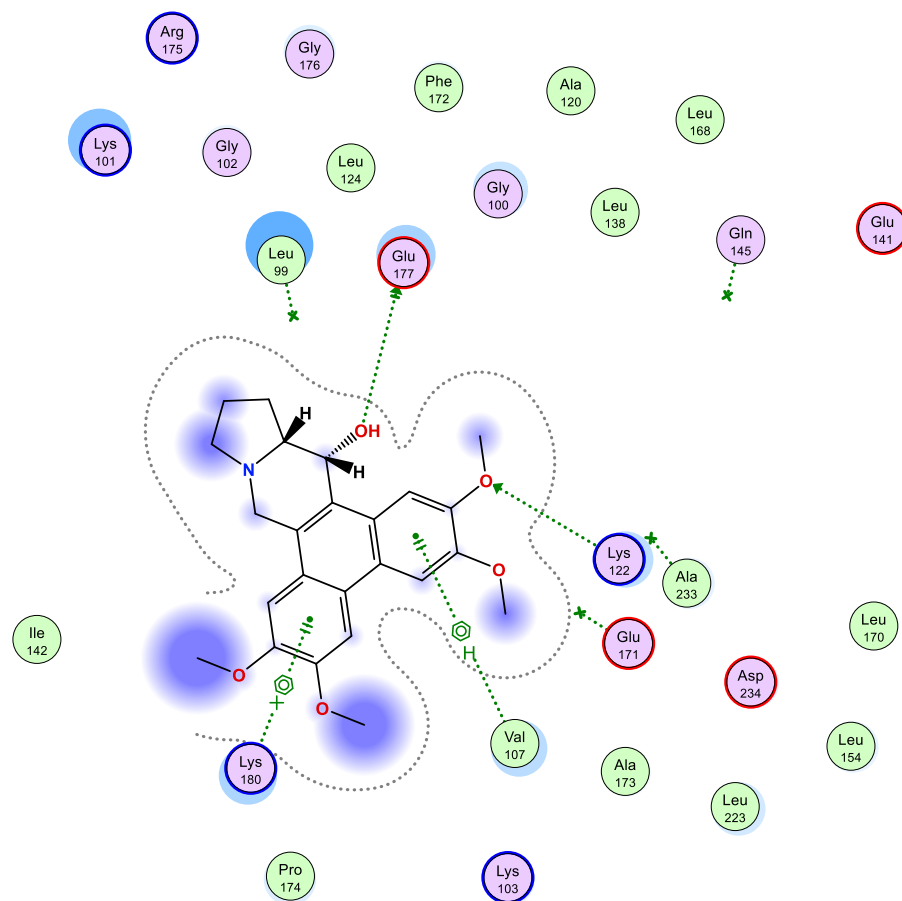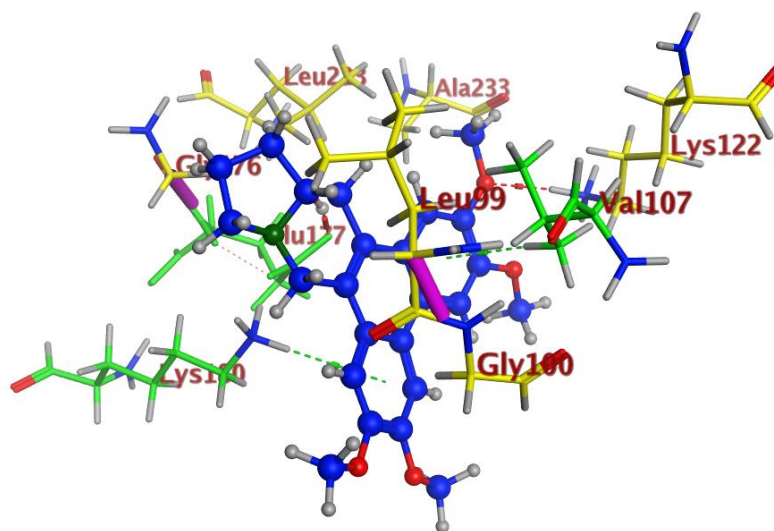

**Tylophorinine: Compound 3, pose 12 (-6.74933577)**

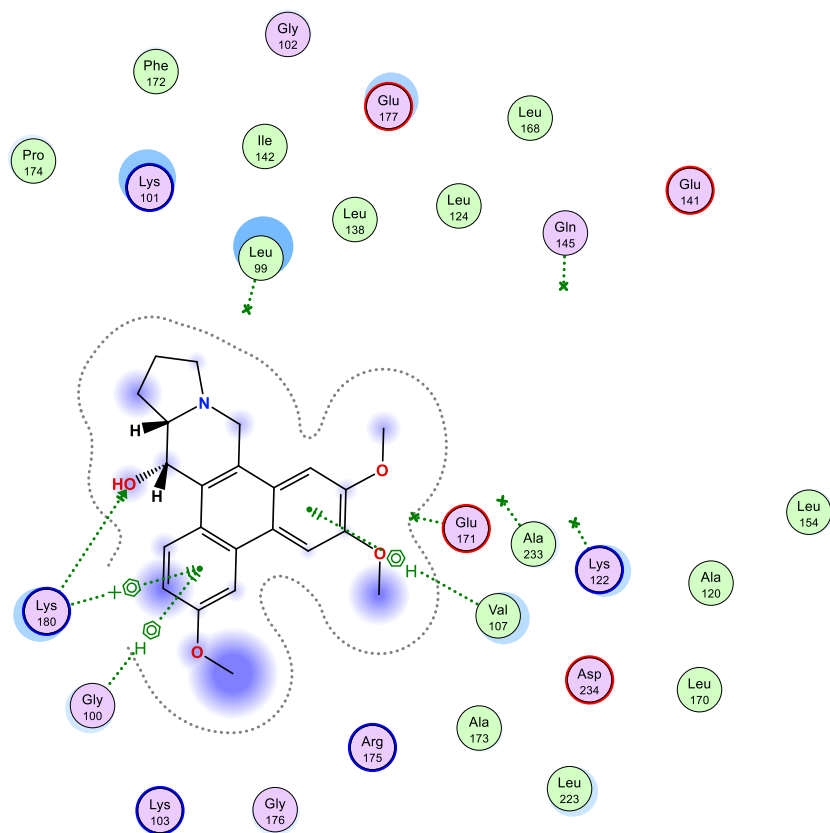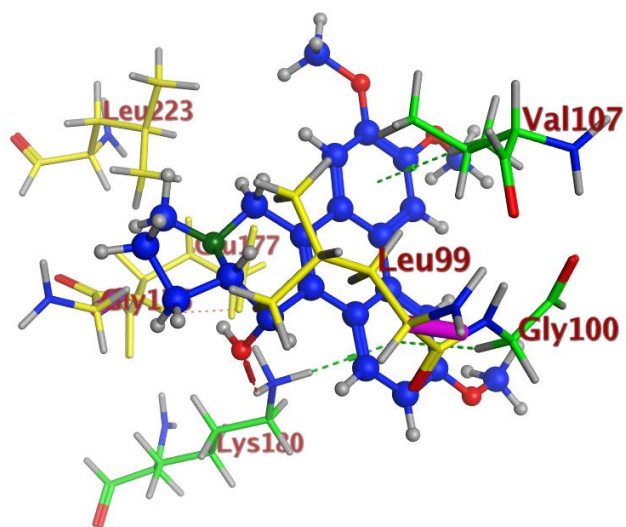

**Tylophorinine N-Oxide: Compound 4, pose 17 (-6.87936831)**

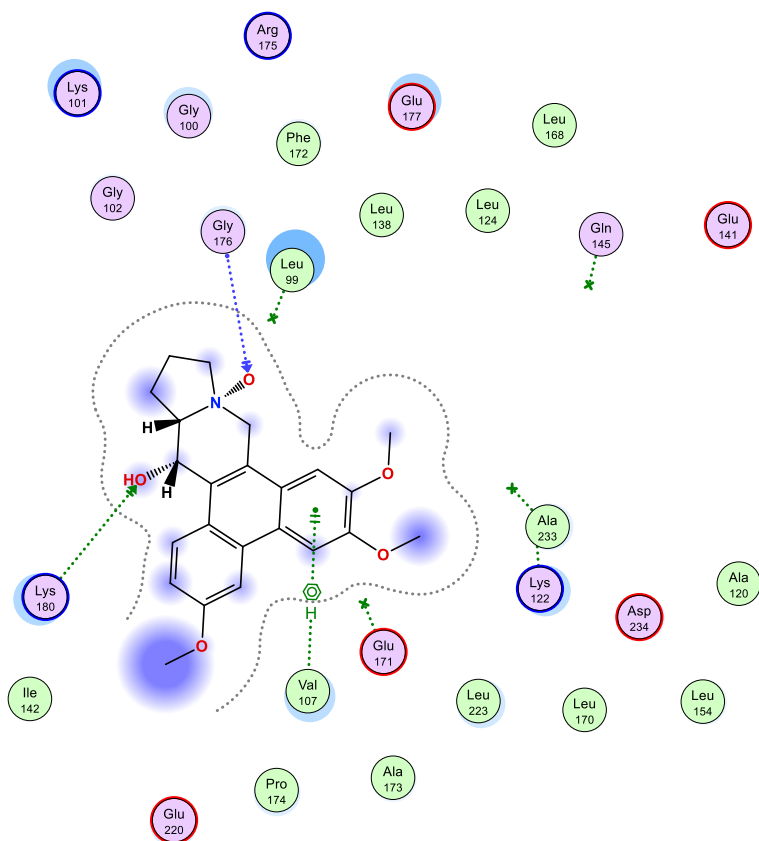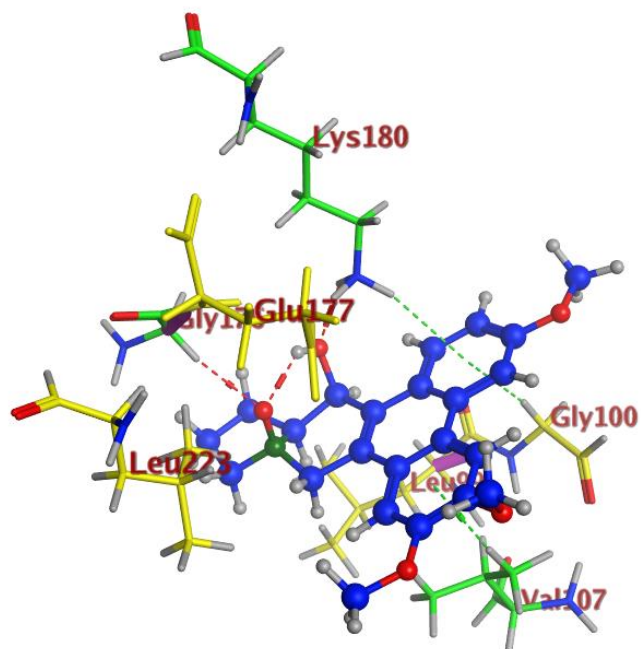

The proton of hydroxy group at C-14 was interacted with the oxygen atom of N-oxide forming intramolecular hydrogen bonding led to stable six membered ring, which might affect the activity.

Tylophorinidine: Compound 5, pose 22 (-6.49451017)

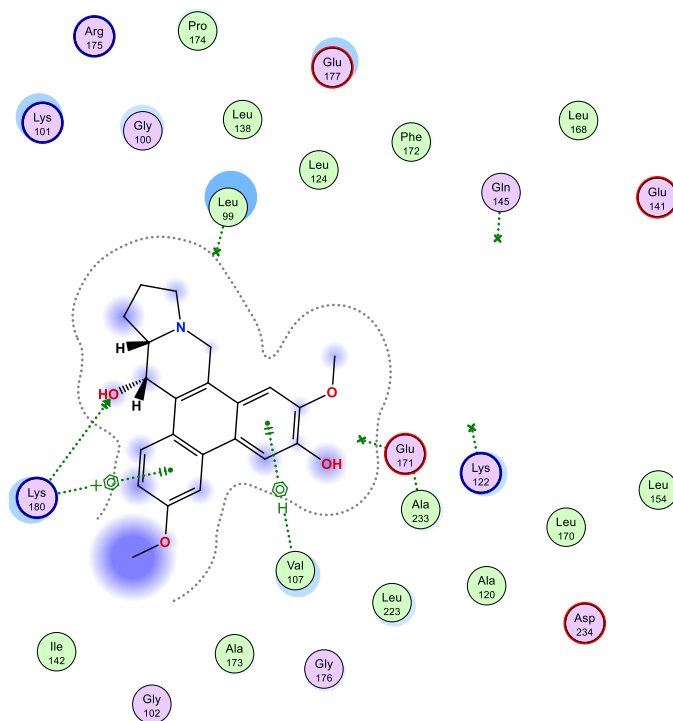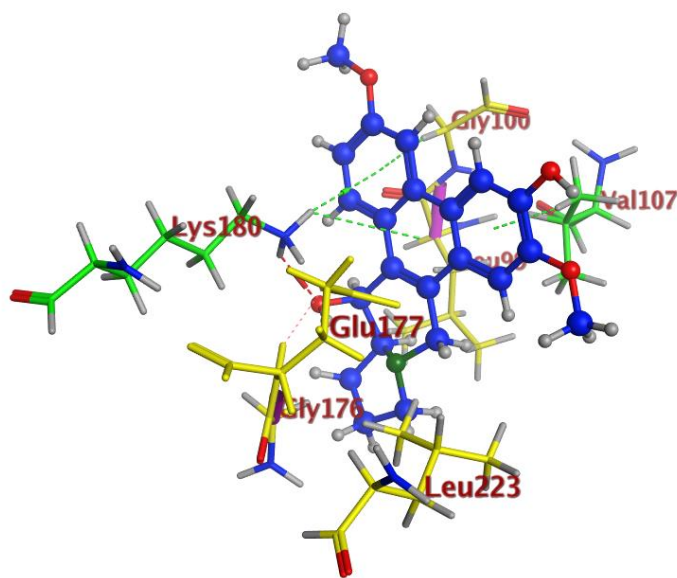

**Tylophorinidine-N-Oxide: Compound 6, pose 28 (-6.51967335)**

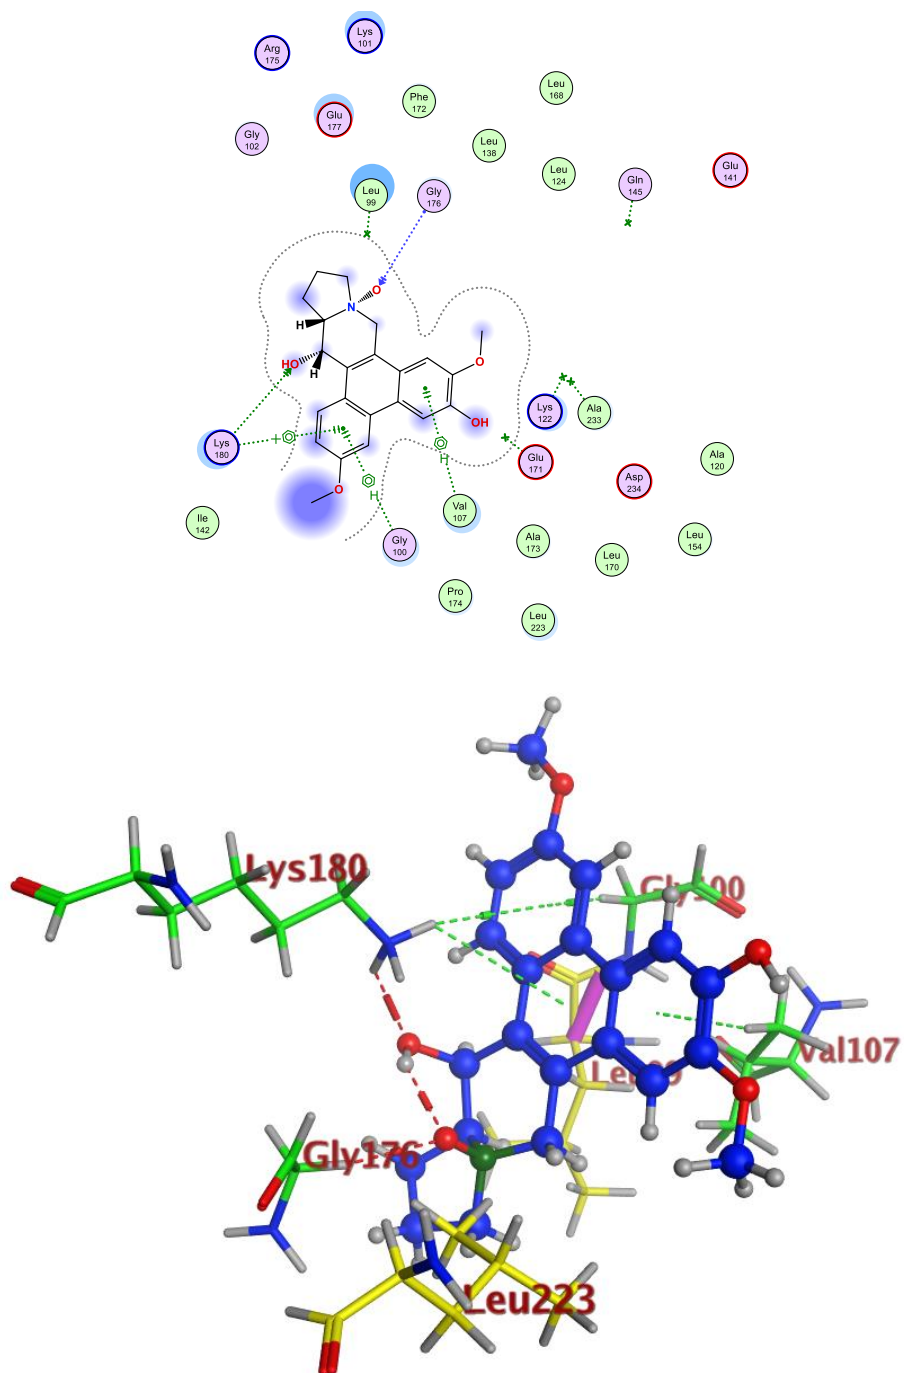

The proton of hydroxy group at C-14 was interacted with the oxygen atom of N-oxide forming intramolecular hydrogen bonding led to stable six membered ring, which might affect the activity.

Septicine: Compound 7, pose 33 (-7.06729412)

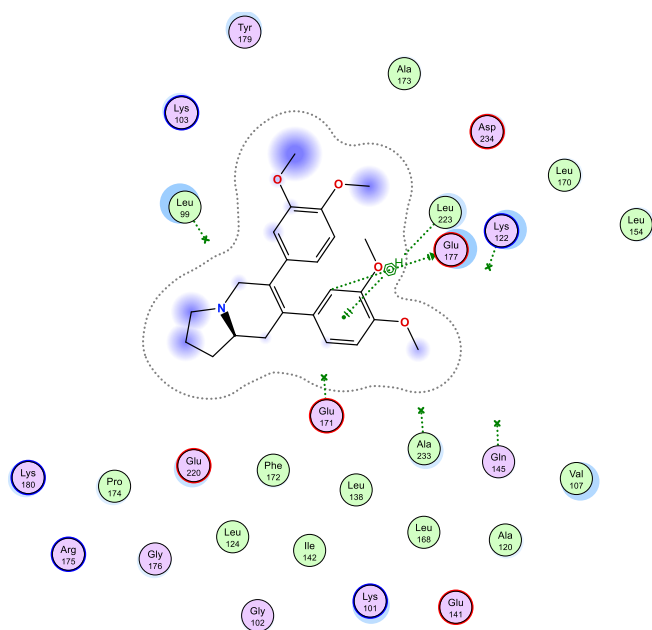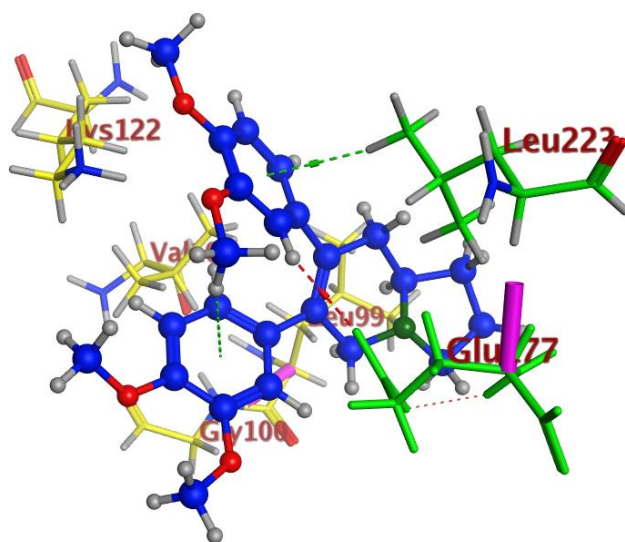



Chlorogenic acid: Compound 8, pose 36 (-6.6264019)

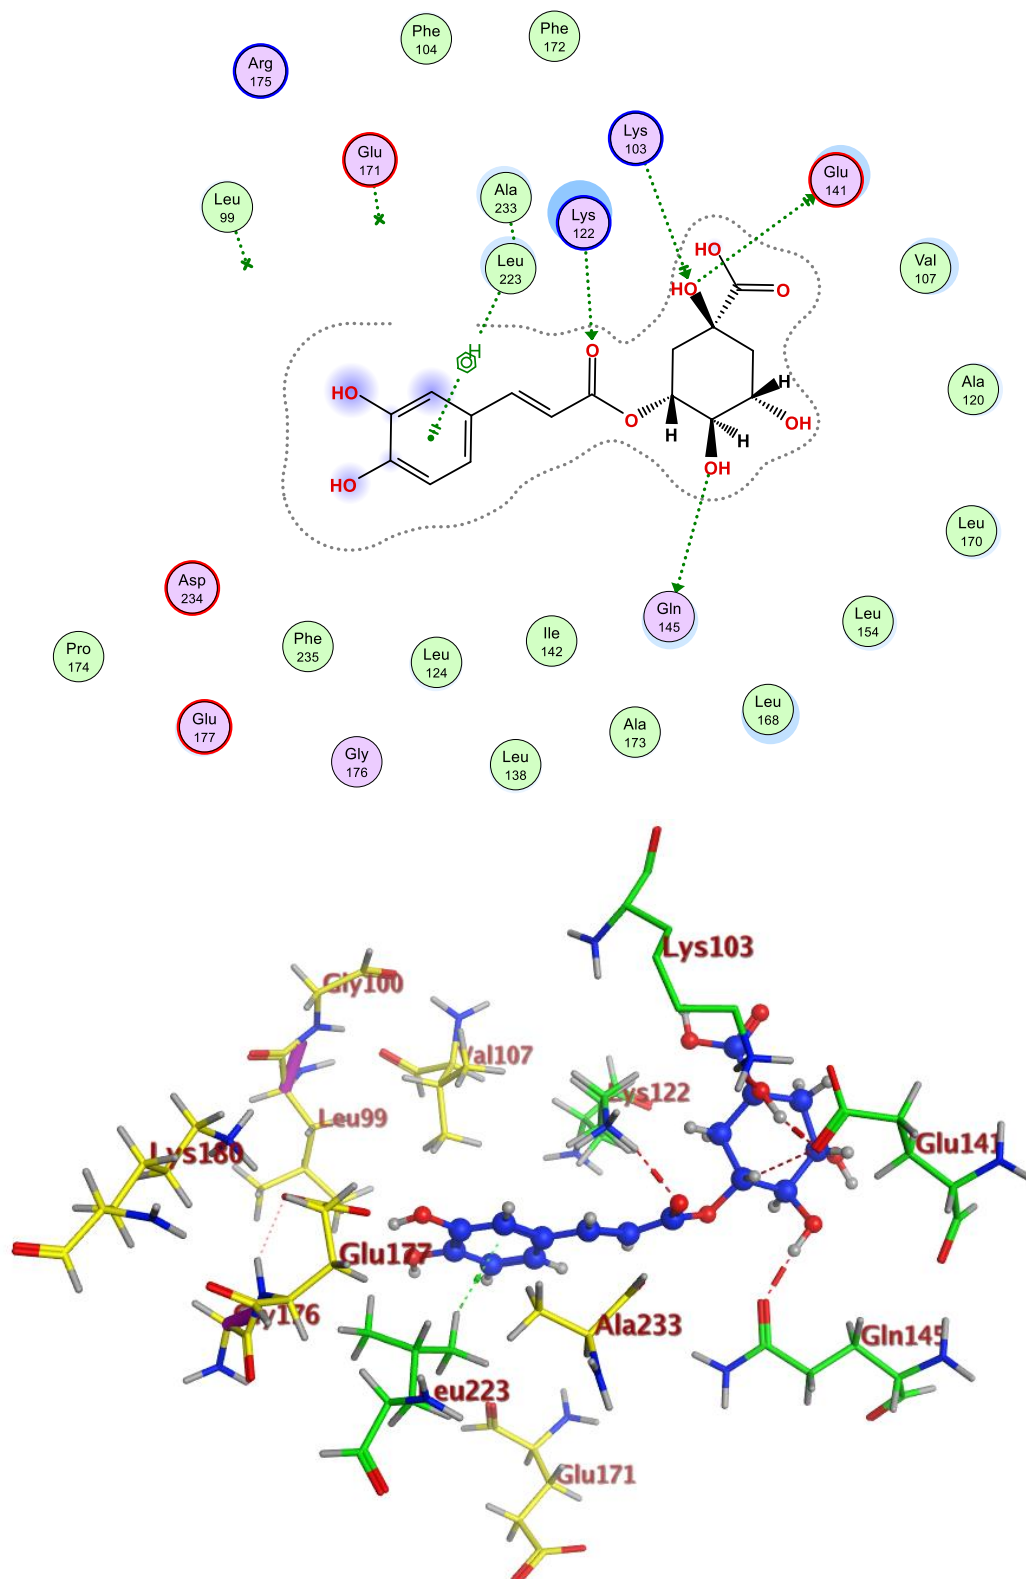

Chlorogenic acid methyl ester: Compound 9, pose 42 (-6.00779295)

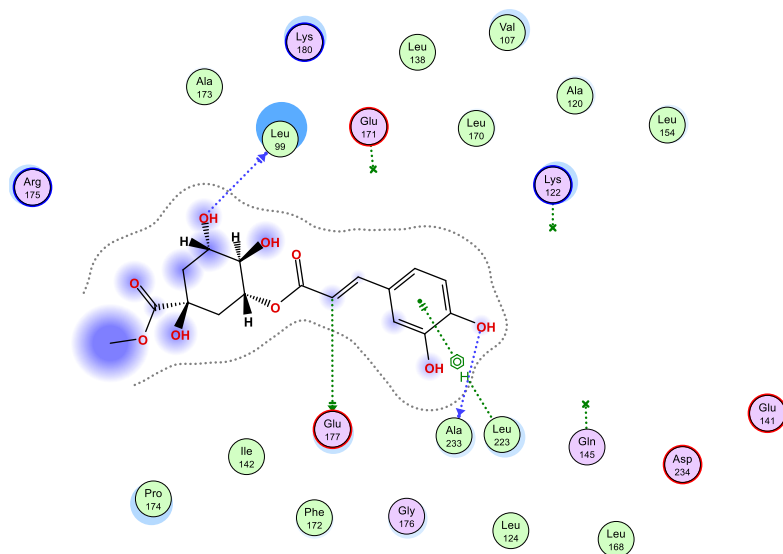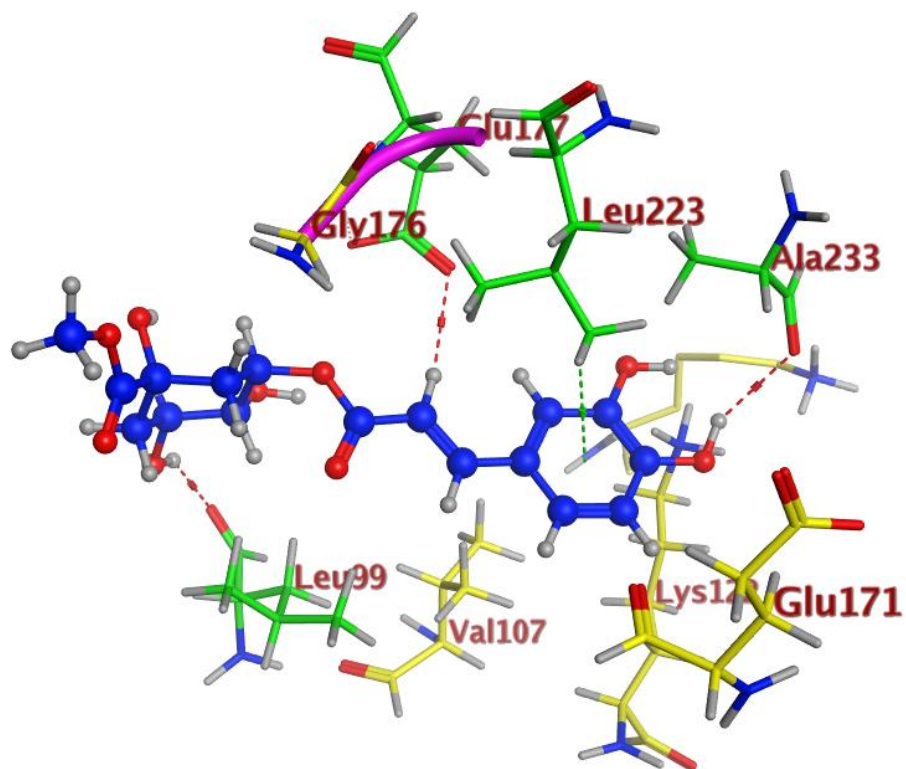

Supplement: s1 [file s1]
