# Supplementary material for: In Vitro Anti-Proliferative, and Kinase Inhibitory Activity of Phenanthroindolizidine Alkaloids Isolated from Tylophora indica
Source: MDPI journal article supplement (doi:10.3390/plants11101295), 2022-05-12

## 1MQ4 Crystal Structure of Aurora-A Protein Kinase

Protein kinases are important drug targets in human cancers, inflammation, and metabolic diseases. This report presents the structures of kinase domains for three cancer-associated protein kinases: ephrin receptor A2 (EphA2), focal adhesion kinase (FAK), and Aurora-A. The expression profiles of EphA2, FAK, and Aurora-A in carcinomas suggest that inhibitors of these kinases may have inherent potential as therapeutic agents. The structures were determined from crystals grown in nanovolume droplets, which produced high-resolution diffraction data at 1.7, 1.9, and 2.3 Å for FAK, Aurora-A, and EphA2, respectively. The FAK and Aurora-A structures are the first determined within two unique subfamilies of human kinases, and all three structures provide new insights into kinase regulation and the design of selective inhibitors.

- **Resolution:** 1.90 Å

Ligand interactions: Ala213, Val147, Lys143, Lys162, Glu211, & Glu260

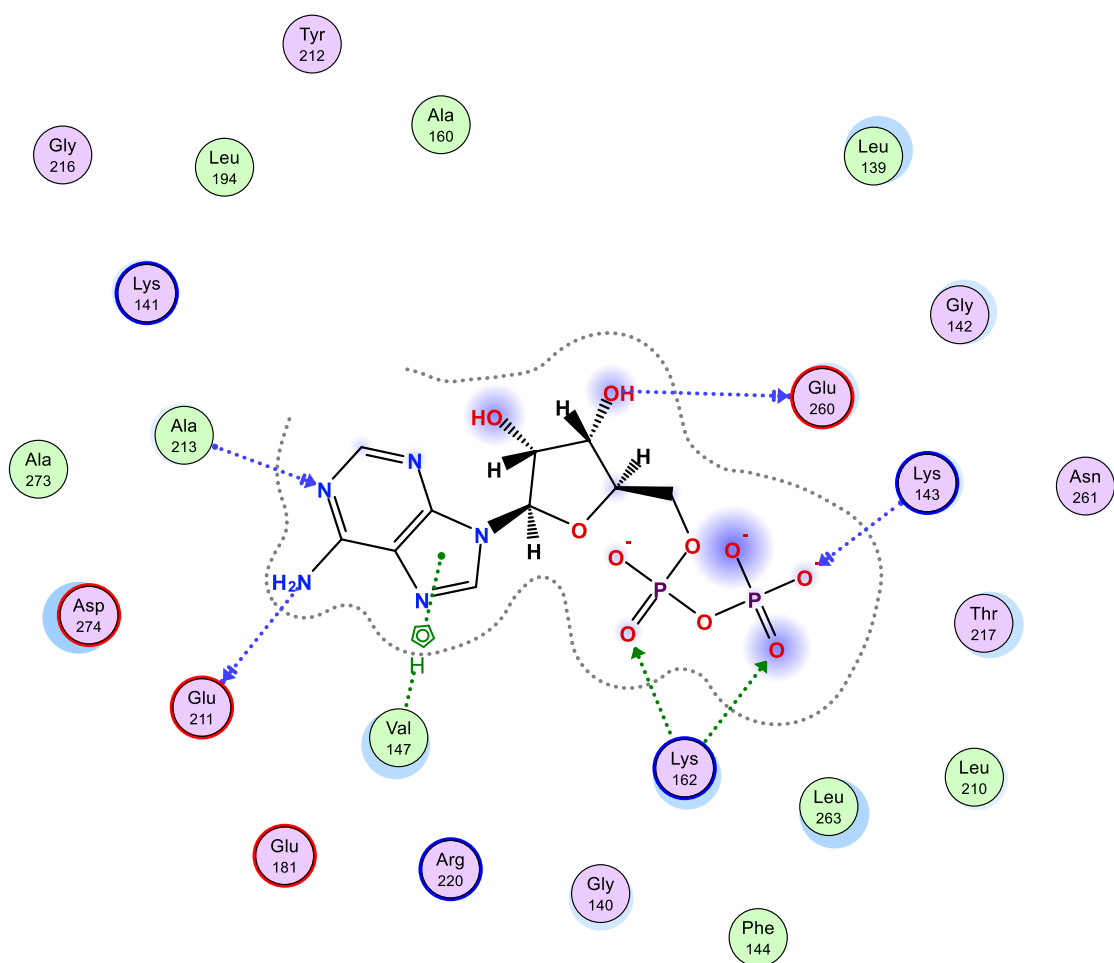

**Compound 1: Tylophorine Pose 1 (-7.75664711)**

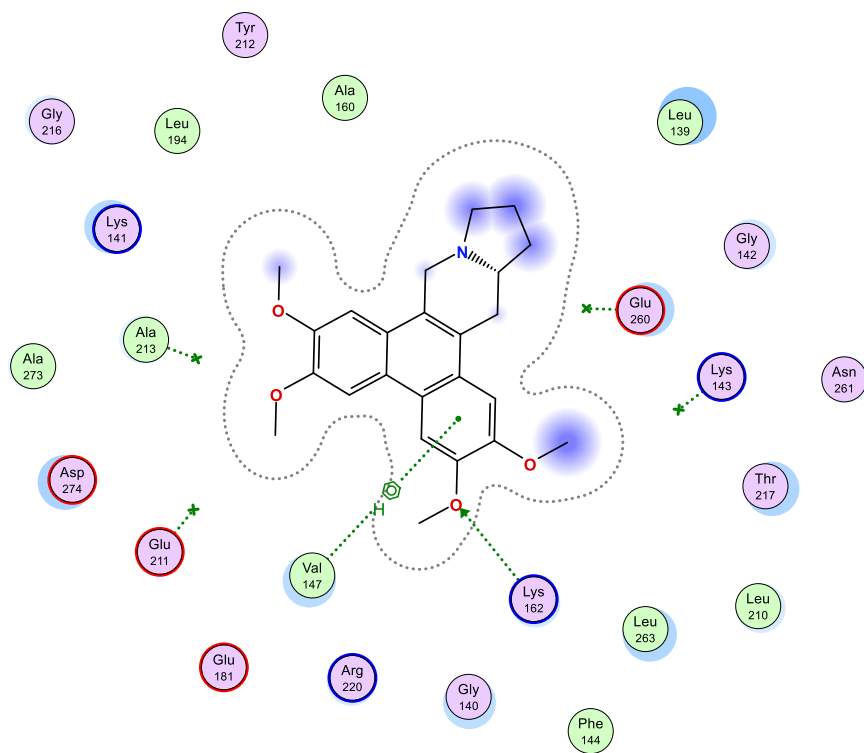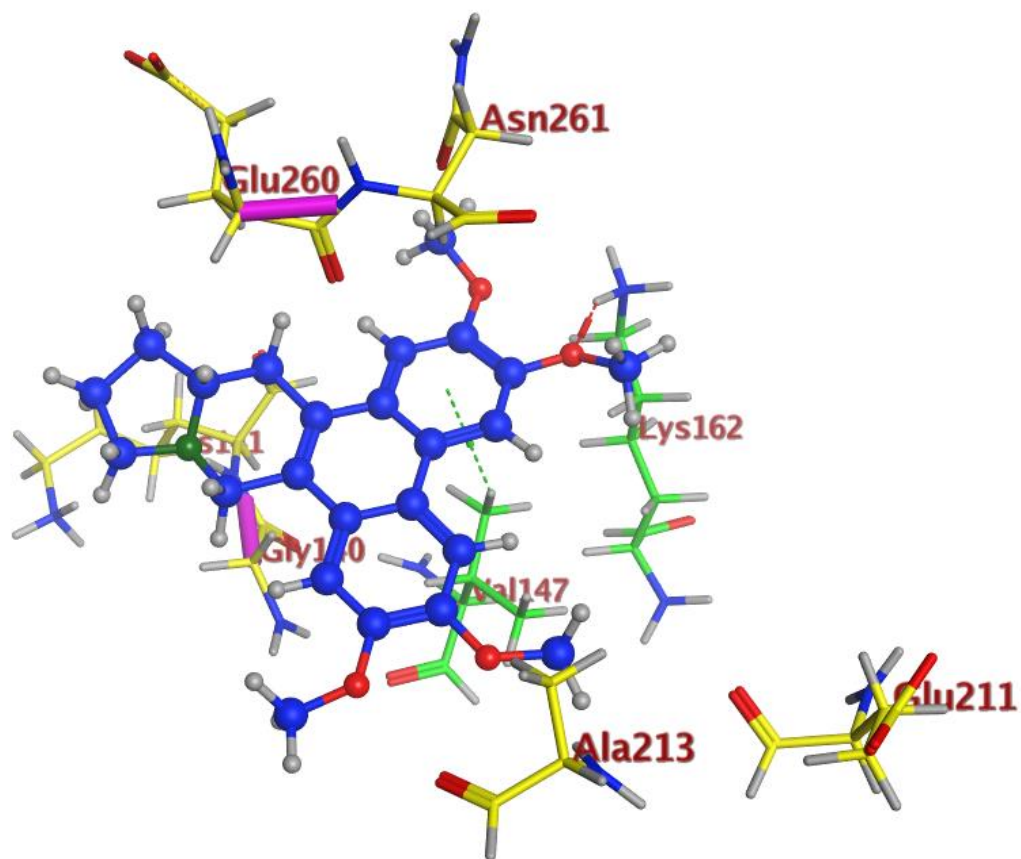

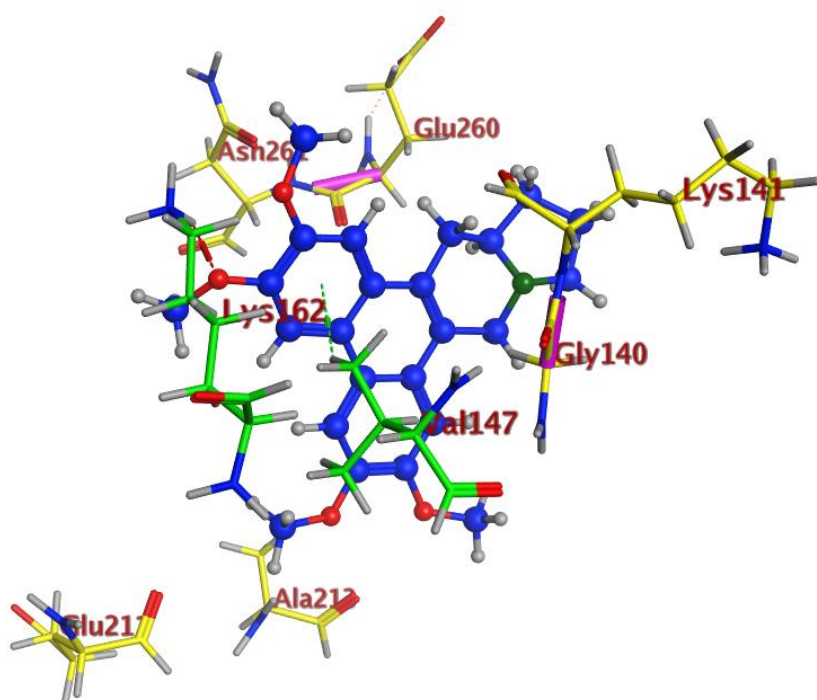

Compound 2: Pose 7 (-7.42515945)

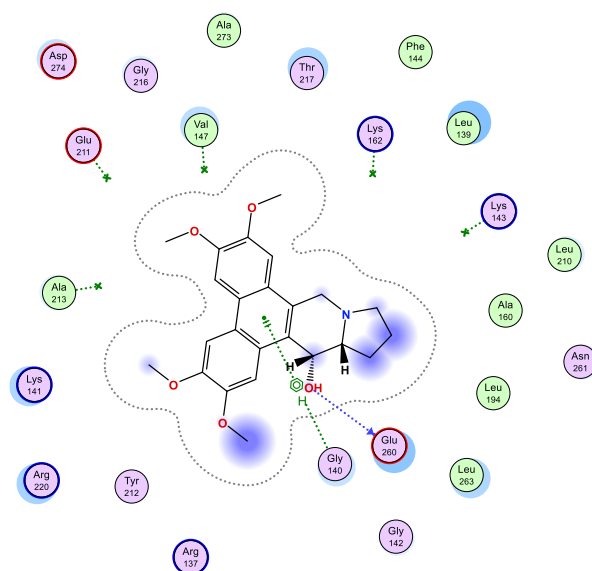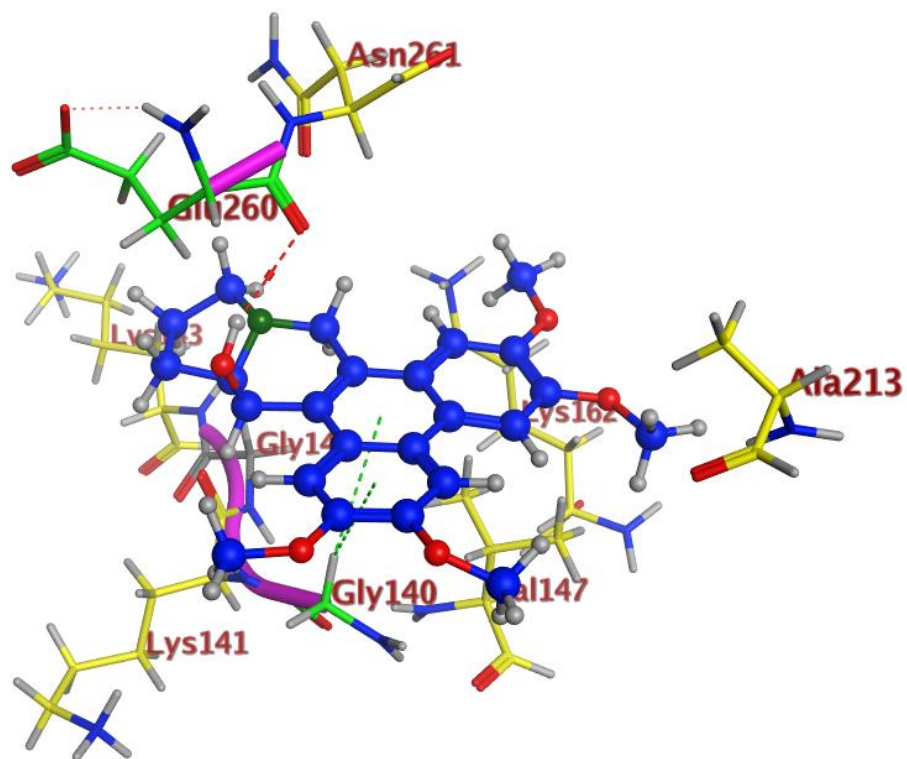

Compound 3: Pose 15 (-6.79220676)

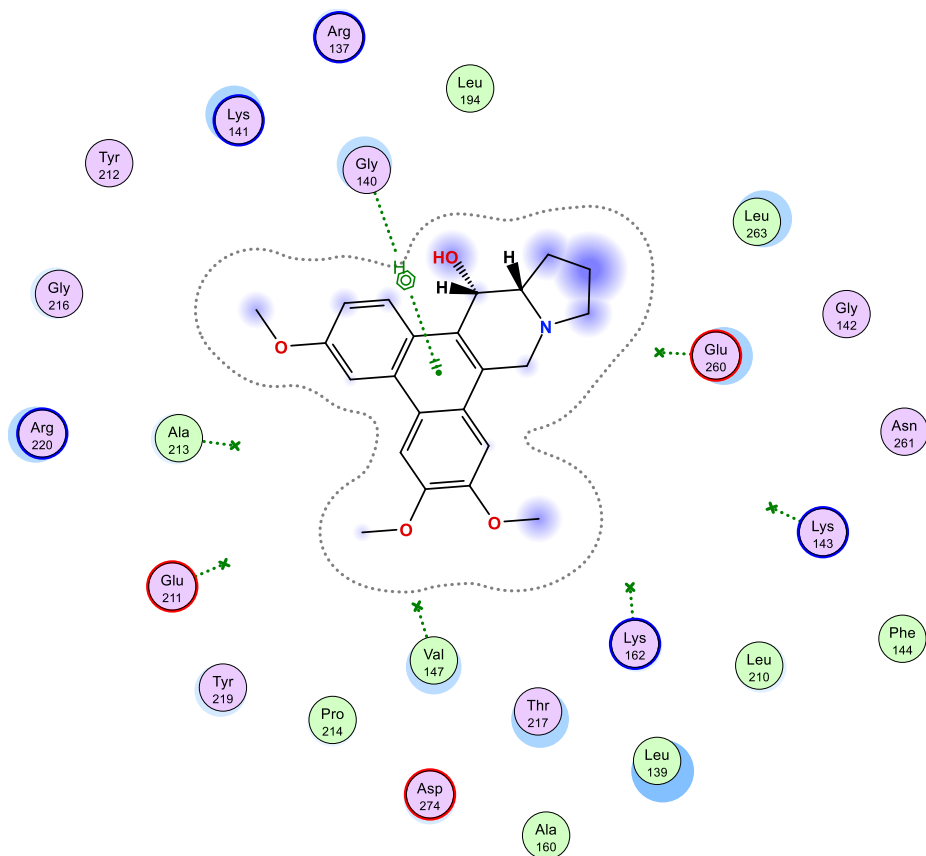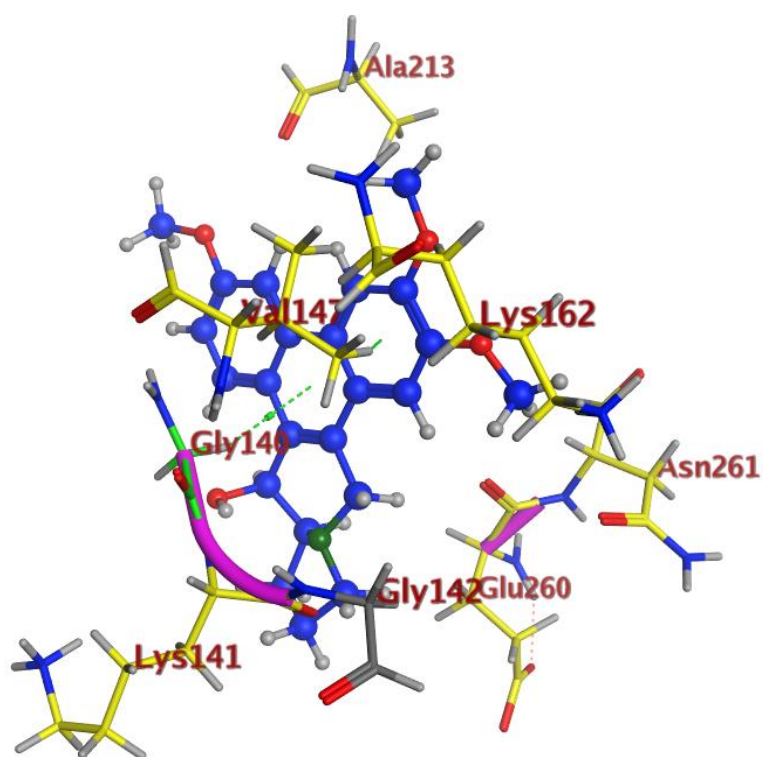

**Compound 4 pose 18 (-7.04823351)**

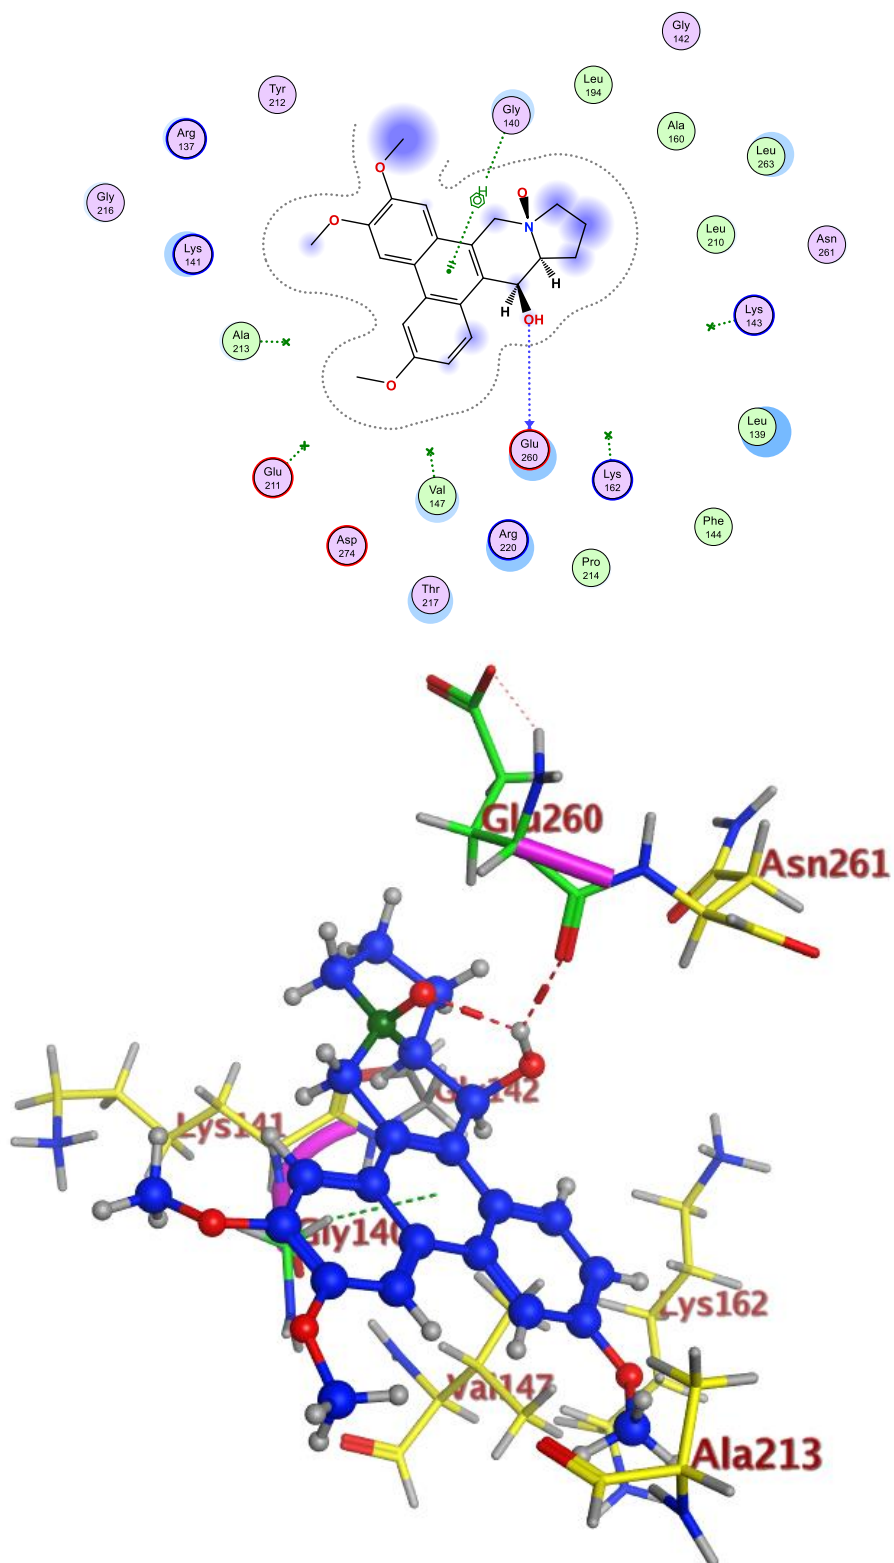

The proton of hydroxy group at C-14 was interacted with the oxygen atom of N-oxide forming intramolecular hydrogen bonding led to stable six membered ring, which might affect the activity.

Compound 5 Pose 21 (-7.44532824)

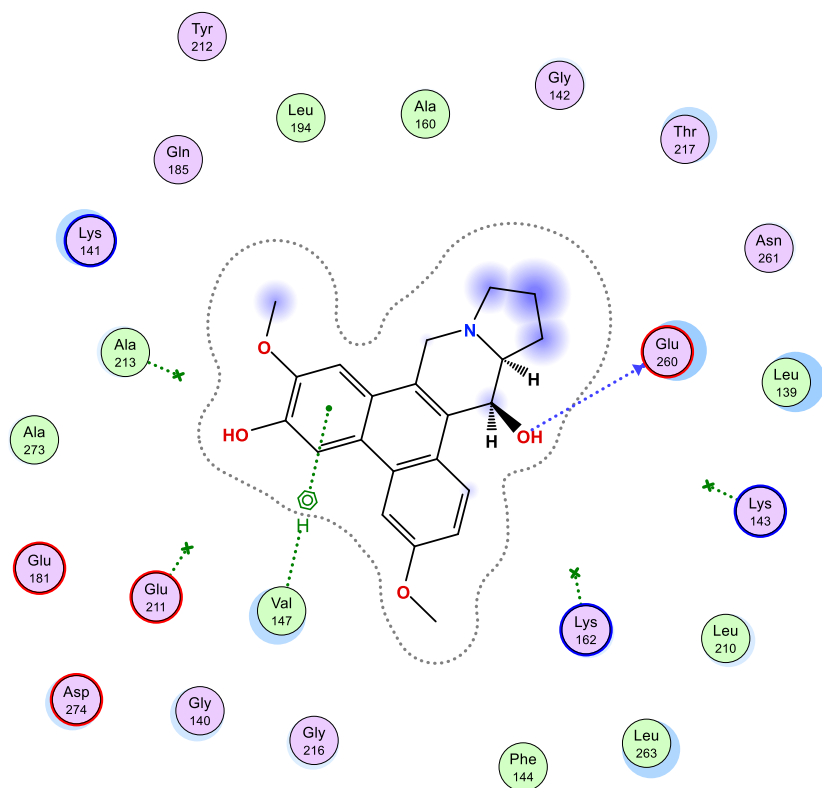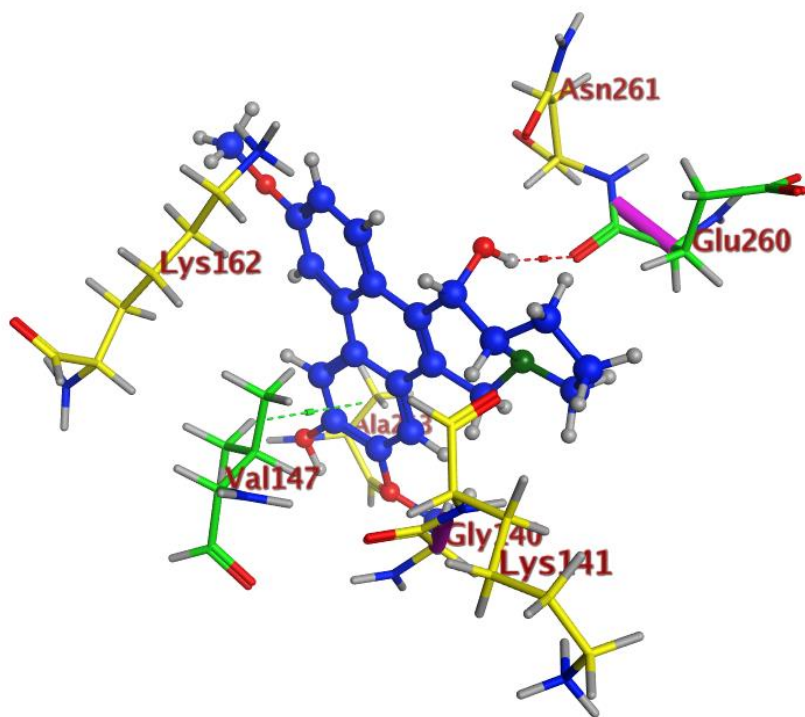

**Compound 6 Pose 27 (-7.2439537)**

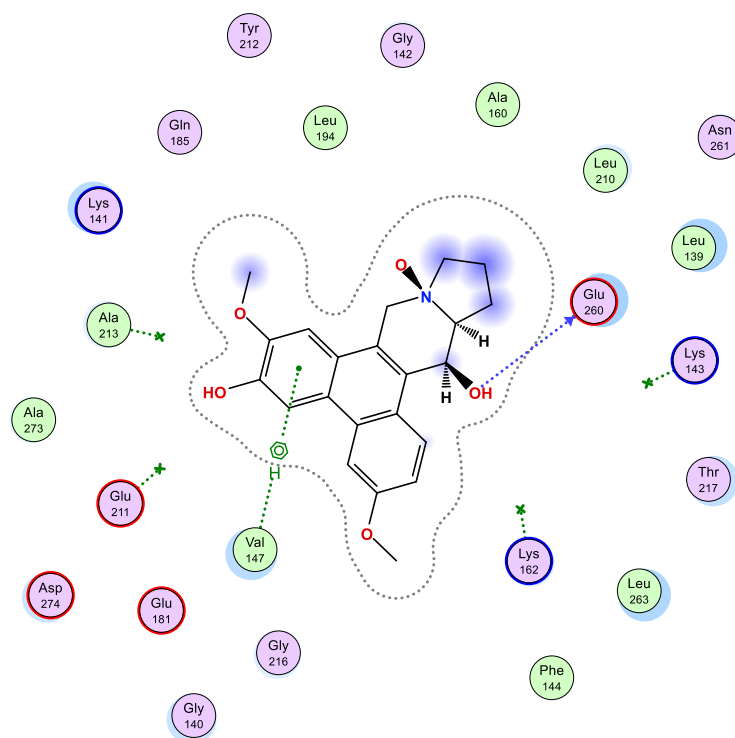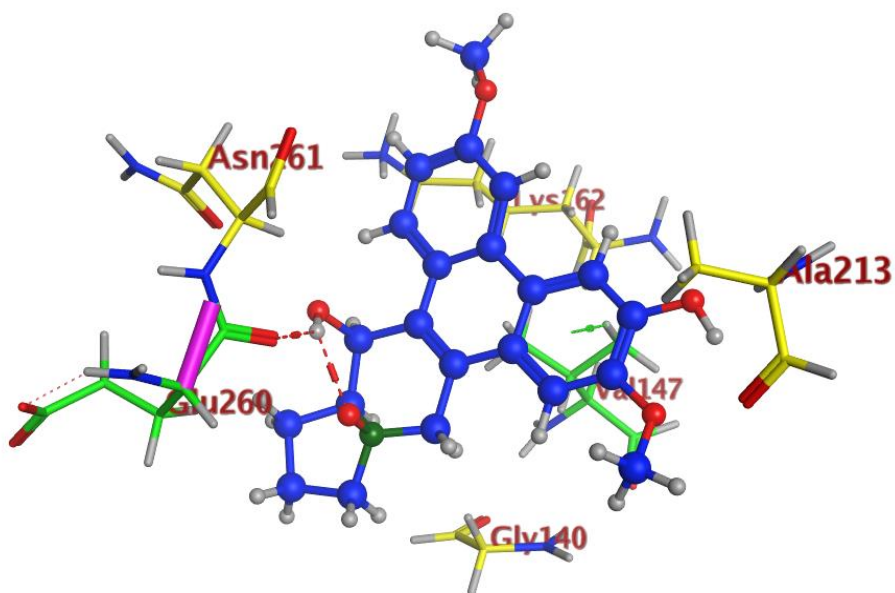

The proton of hydroxy group at C-14 was interacted with the oxygen atom of N-oxide forming intramolecular hydrogen bonding led to stable six membered ring, which might affect the activity.



Compound 7 Pose 35 (-7.2439537)

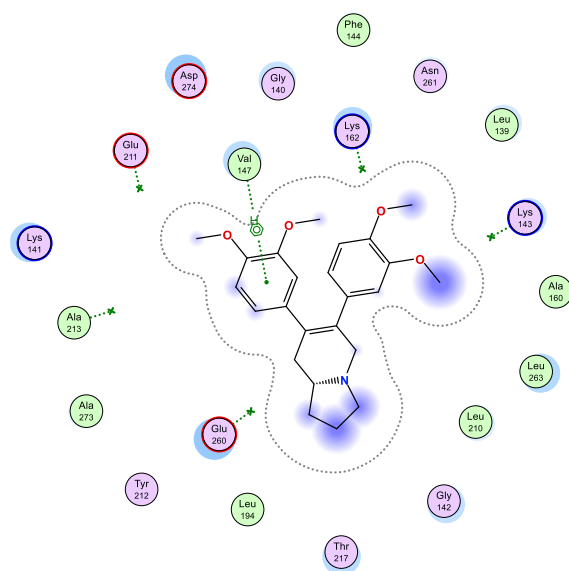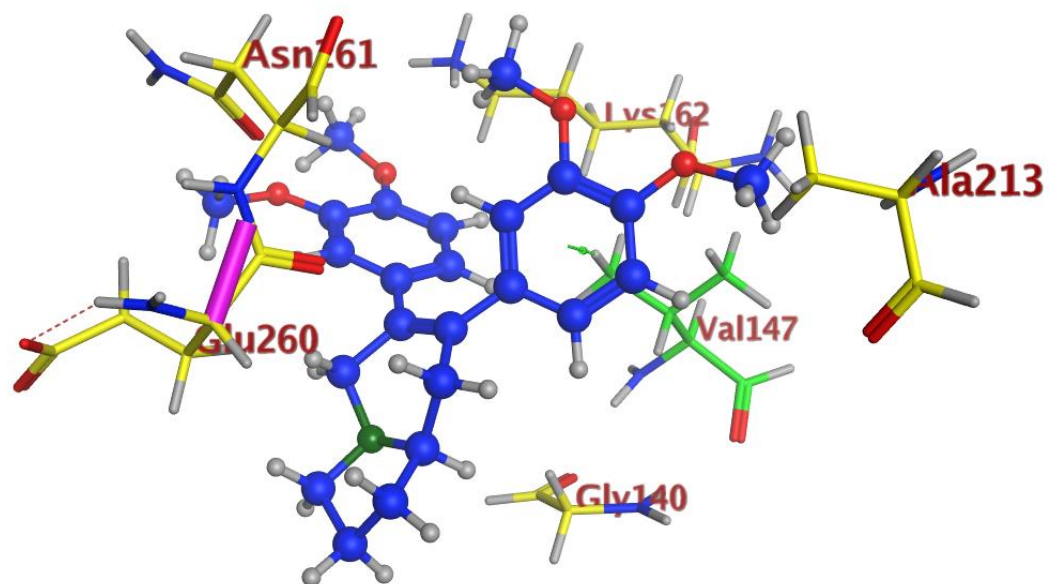

Compound 8 Pose 37 (-6.66843224)

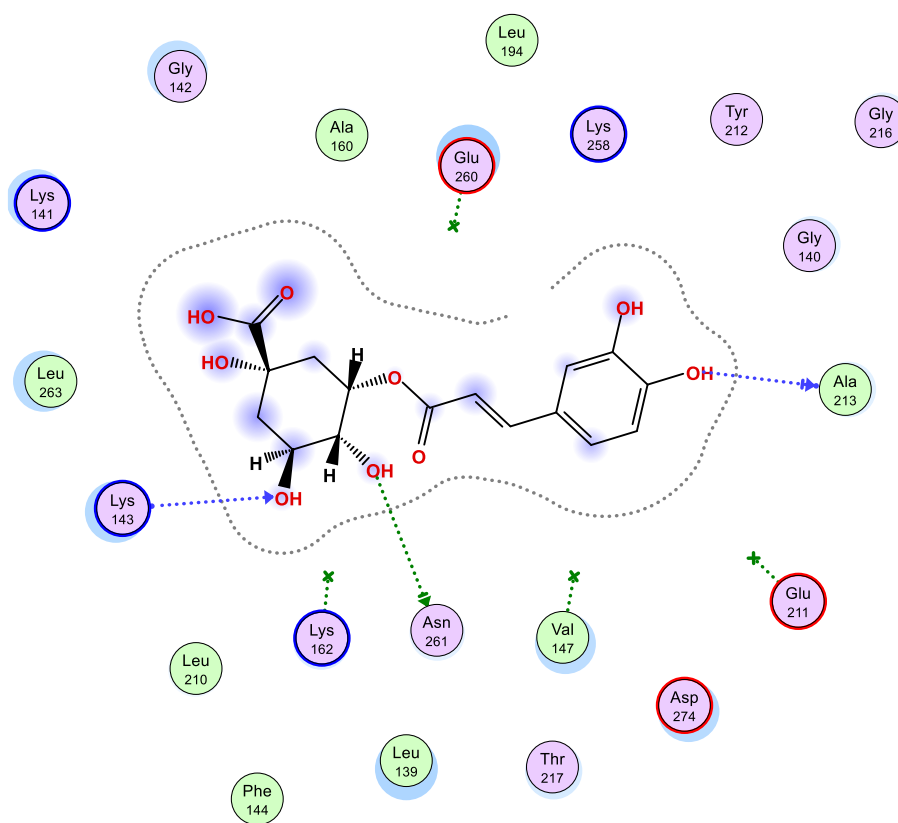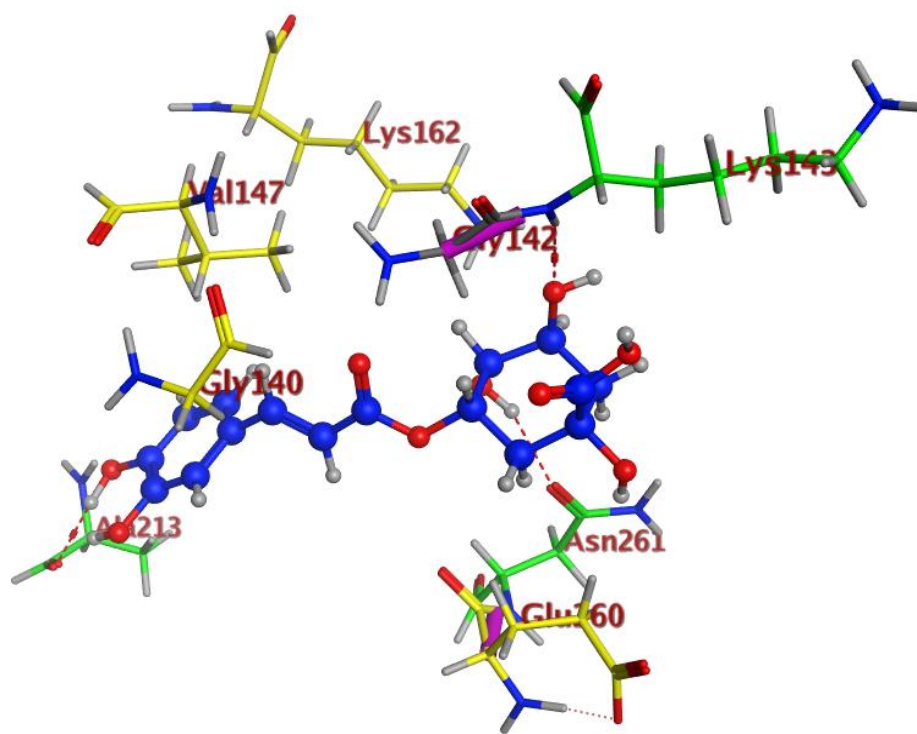

Compound 9 Pose 41 (-7.22312737)

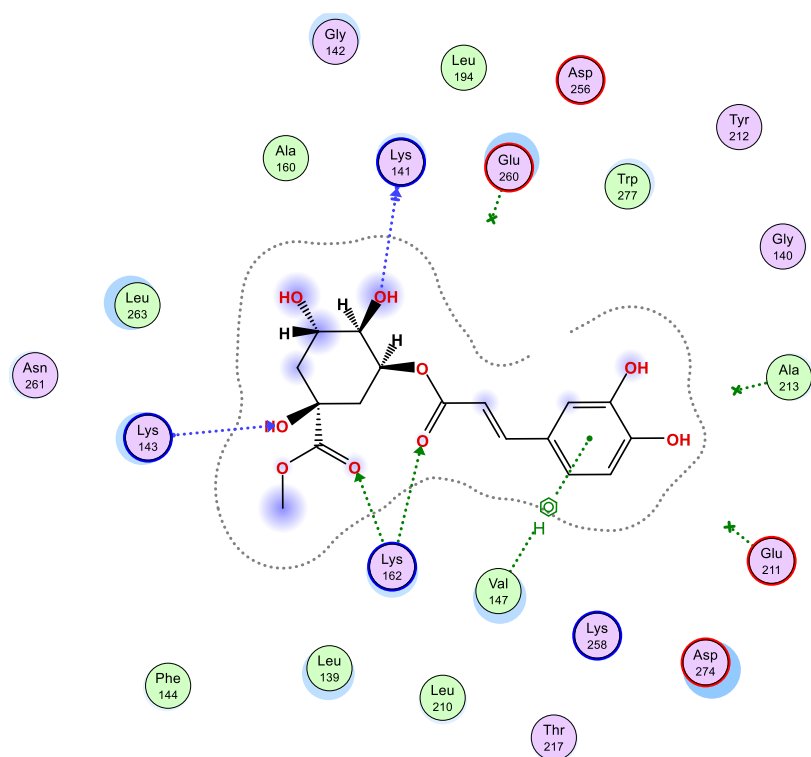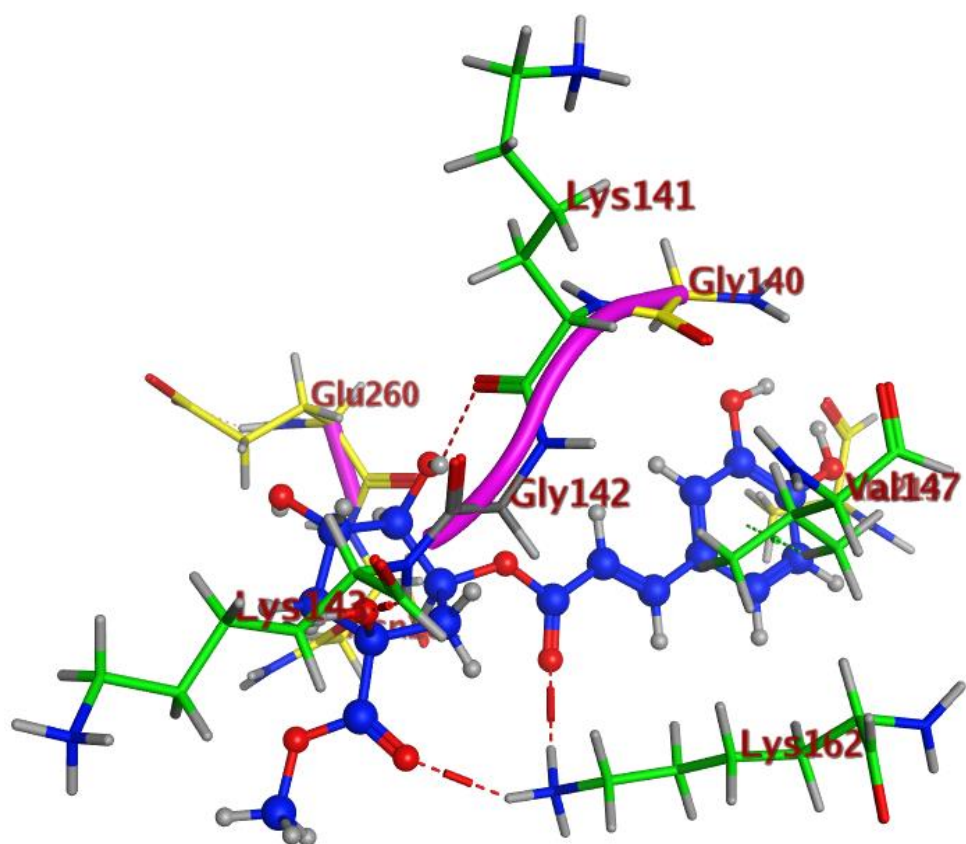

Supplement: s1 [file s1]
