# Supplementary material for: In Vitro Anti-Proliferative, and Kinase Inhibitory Activity of Phenanthroindolizidine Alkaloids Isolated from Tylophora indica
Source: MDPI journal article supplement (doi:10.3390/plants11101295), 2022-05-12
Supplement: s1 [file s1]

## Compound 1: (-)-Tylophorine

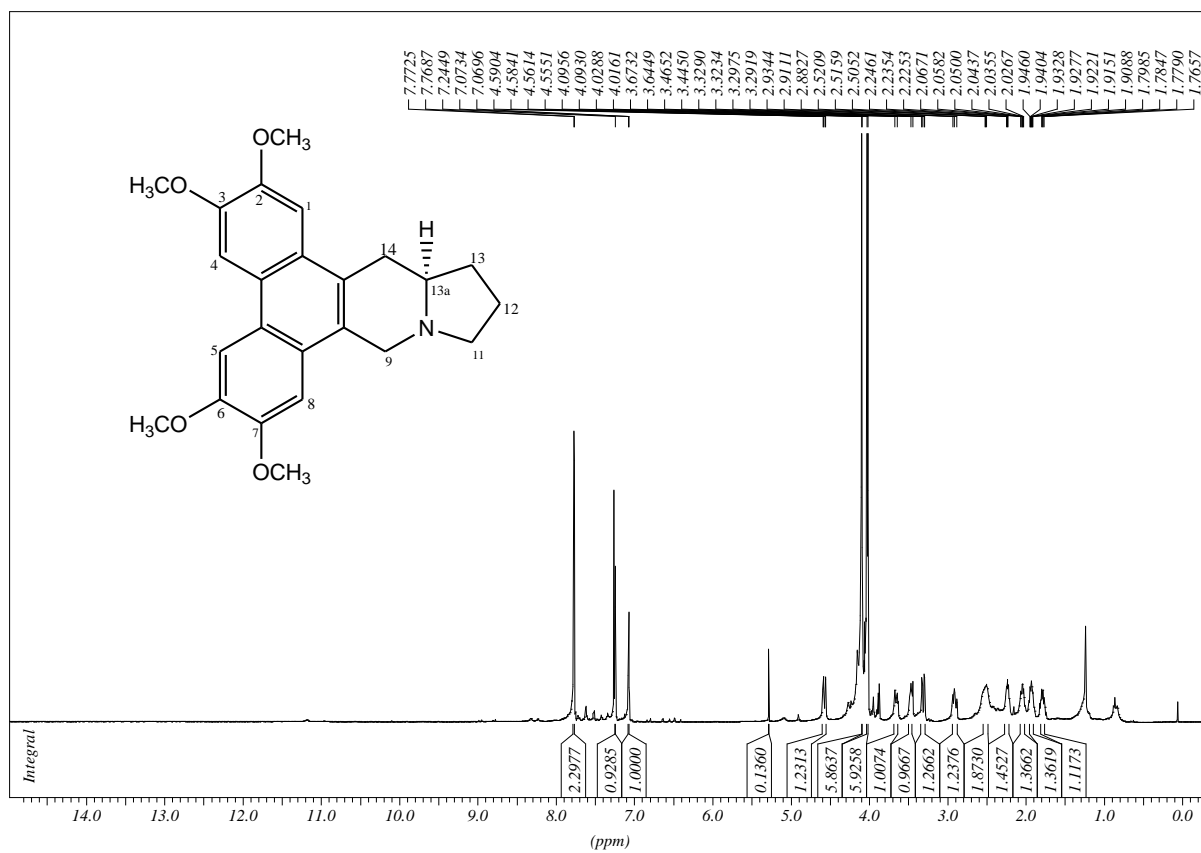

**<sup>1</sup>H-NMR spectrum, (CDCl<sub>3</sub>, 500 MHz)**

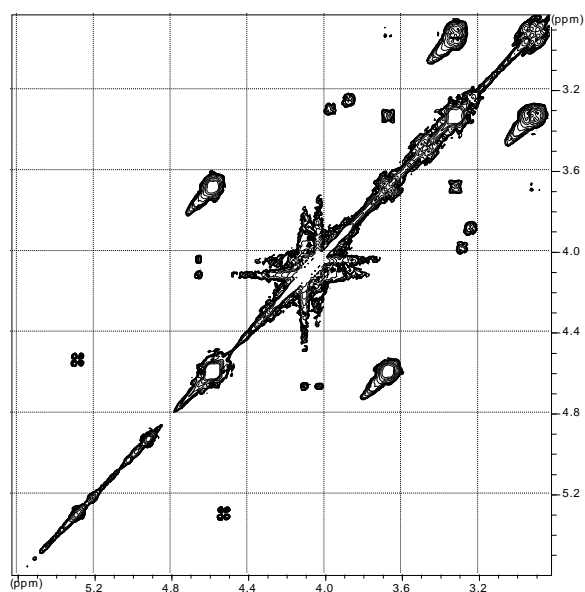

**2D-<sup>1</sup>H, <sup>1</sup>H-COSY spectrum, (CDCl<sub>3</sub>, 500 MHz)**

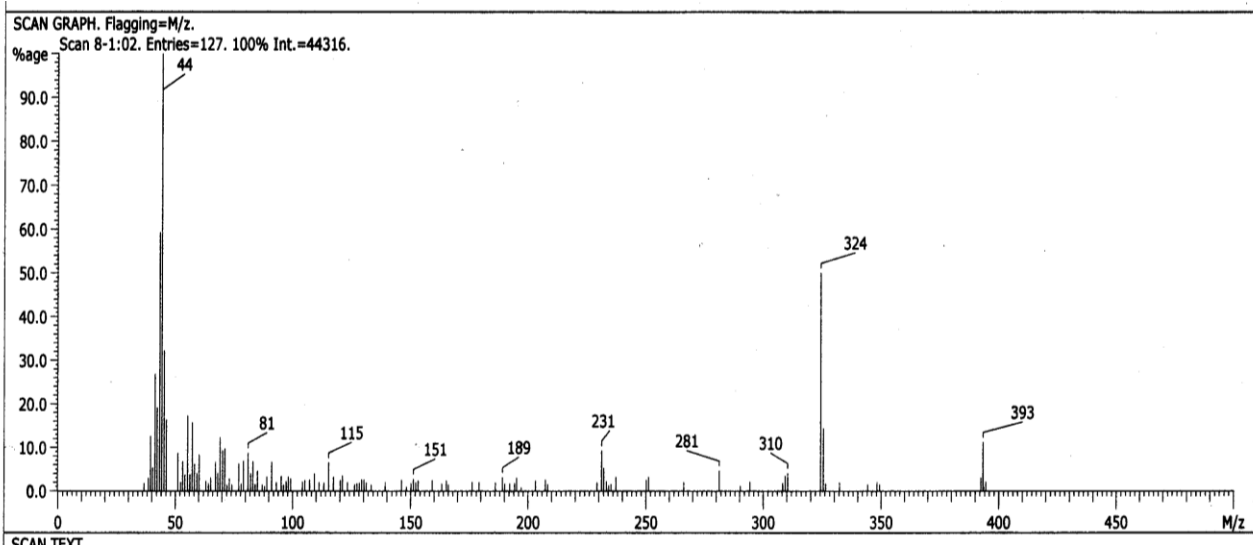

EI-MS

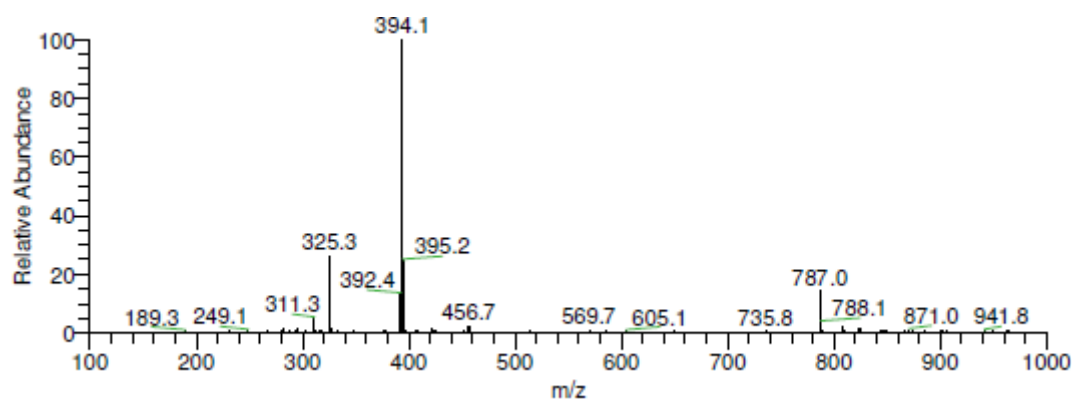

LC-ESI-MS

## Compound 2: (-)-Tylophorinicine

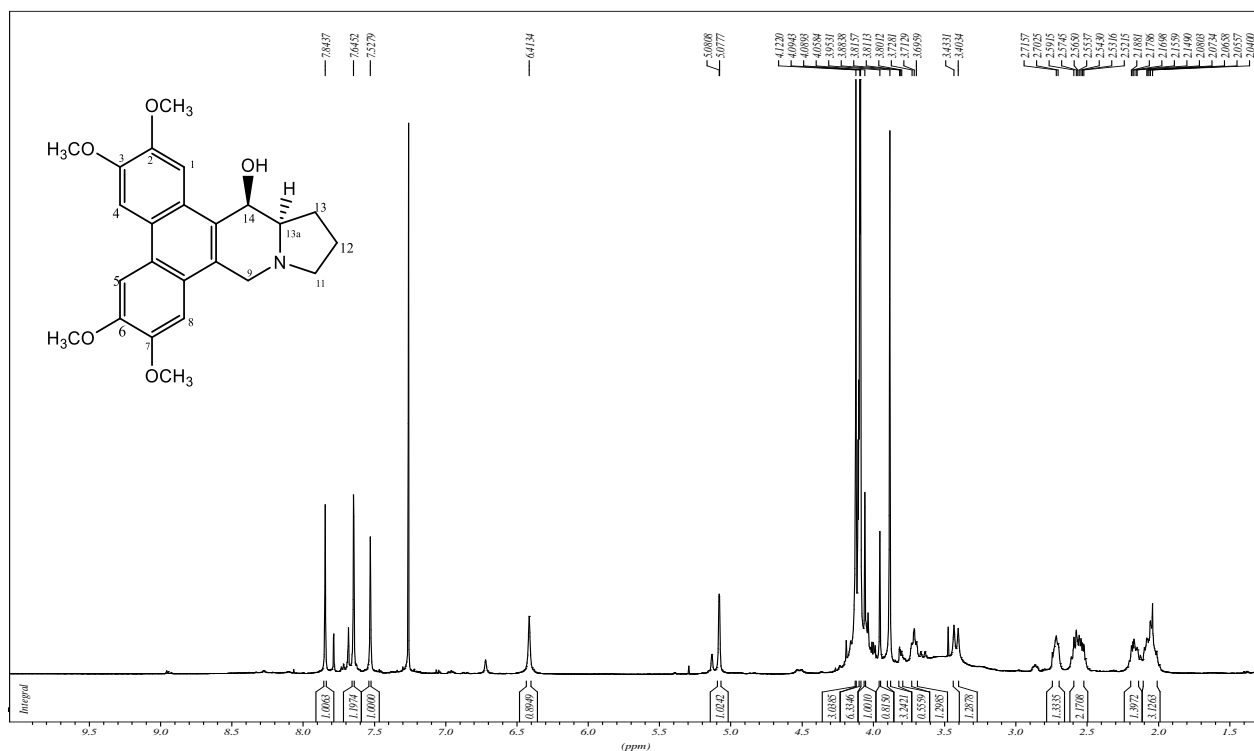

$^1\text{H}$ -NMR spectrum, (CDCl<sub>3</sub>, 500 MHz)

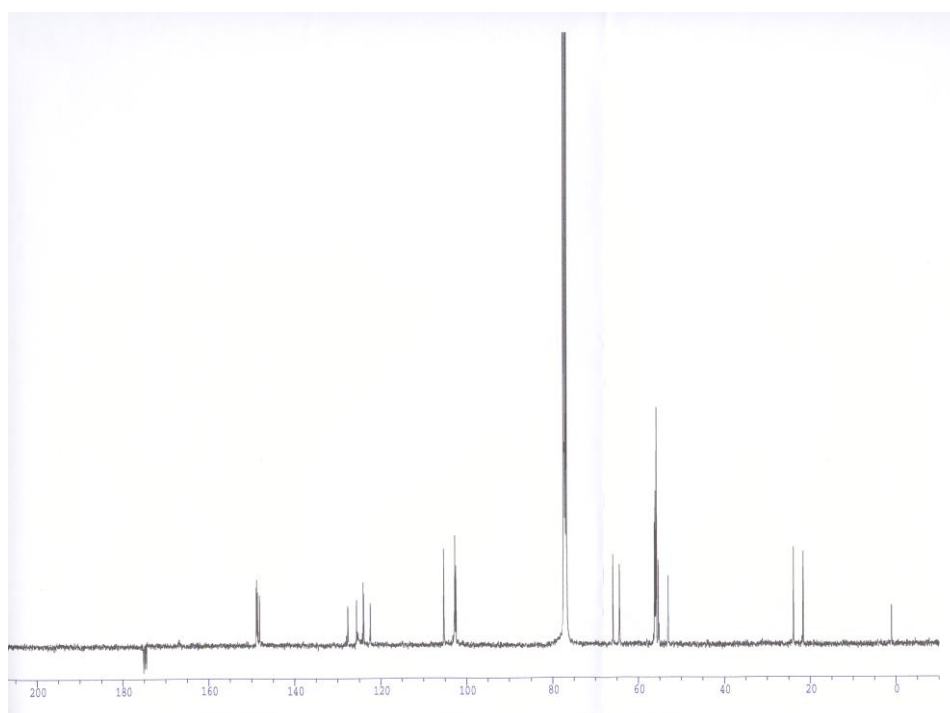

$^{13}\text{C}$ -NMR spectrum, (CDCl<sub>3</sub>, 500 MHz)

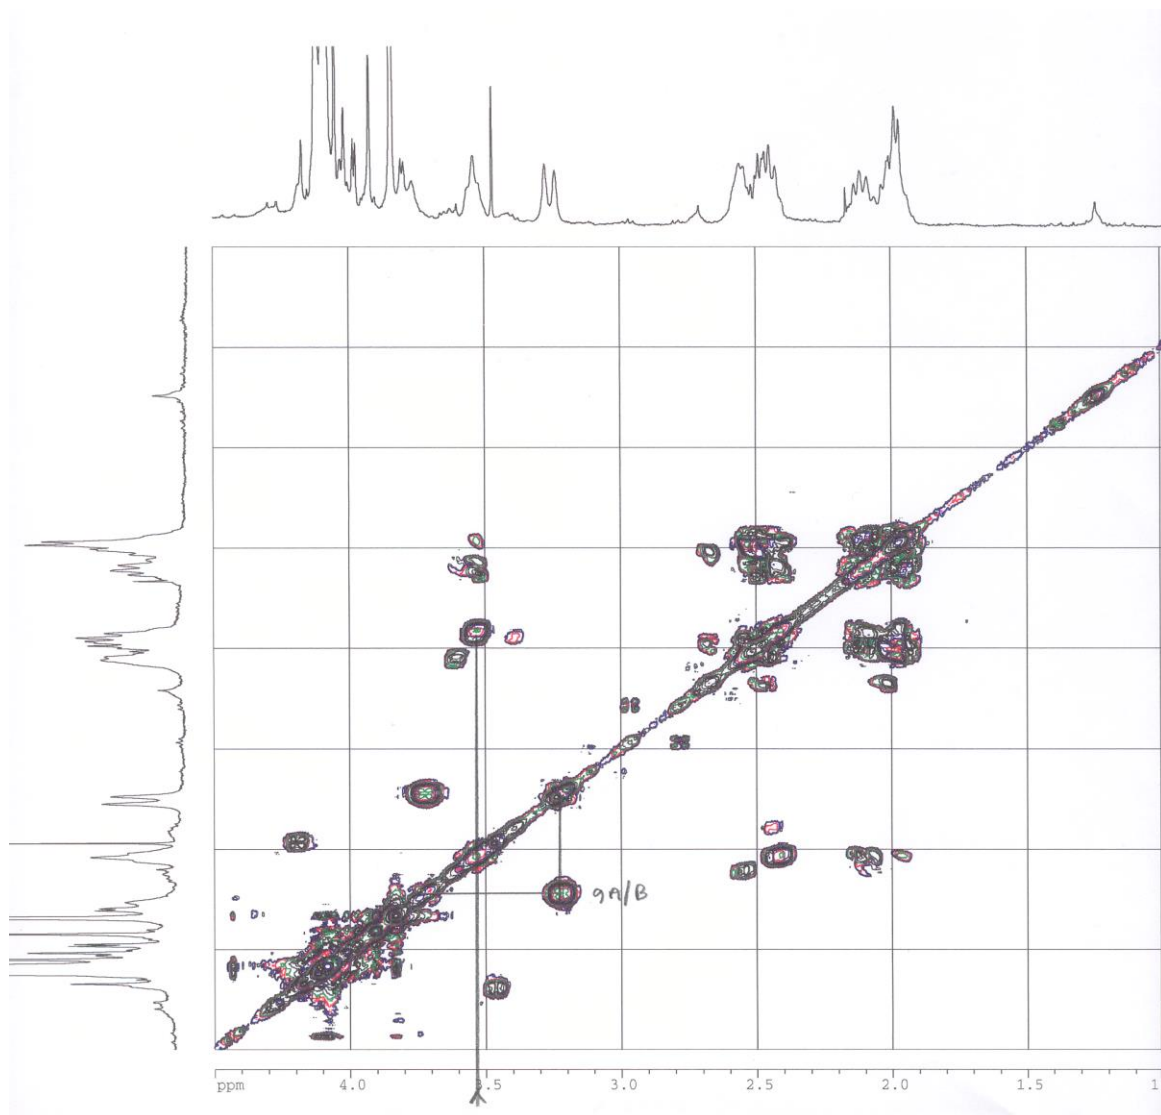

**2D- $^1\text{H}$ ,  $^1\text{H}$ -COSY spectrum, ( $\text{CDCl}_3$ , 500 MHz)**

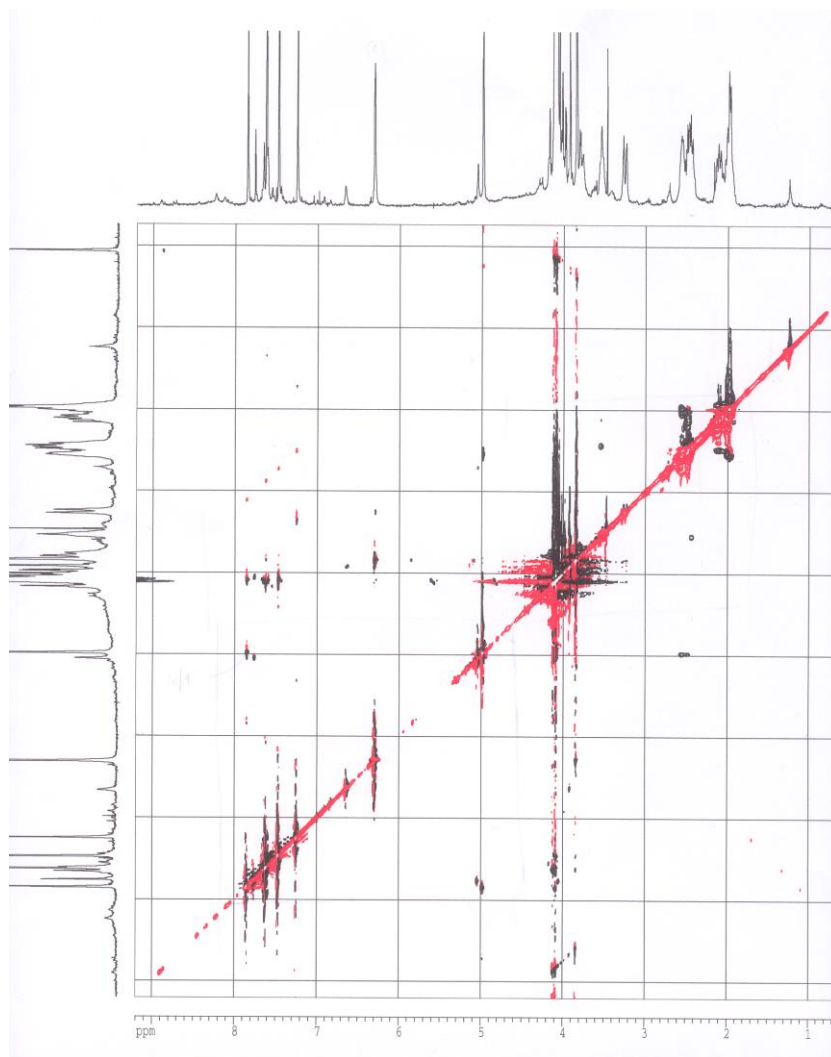

**2D-<sup>1</sup>H, <sup>1</sup>H-ROESY spectrum, (CDCl<sub>3</sub>, 600 MHz)**

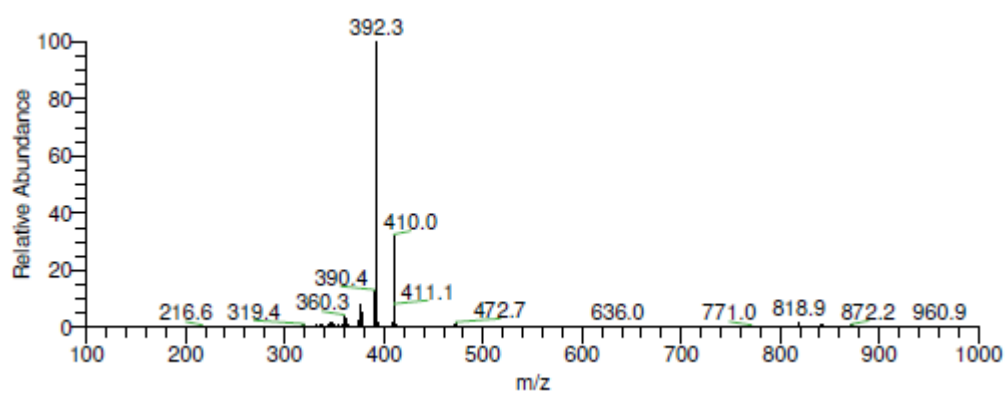

**LC-ESI-MS**

## Compound 3: (+)-Tylophorinine

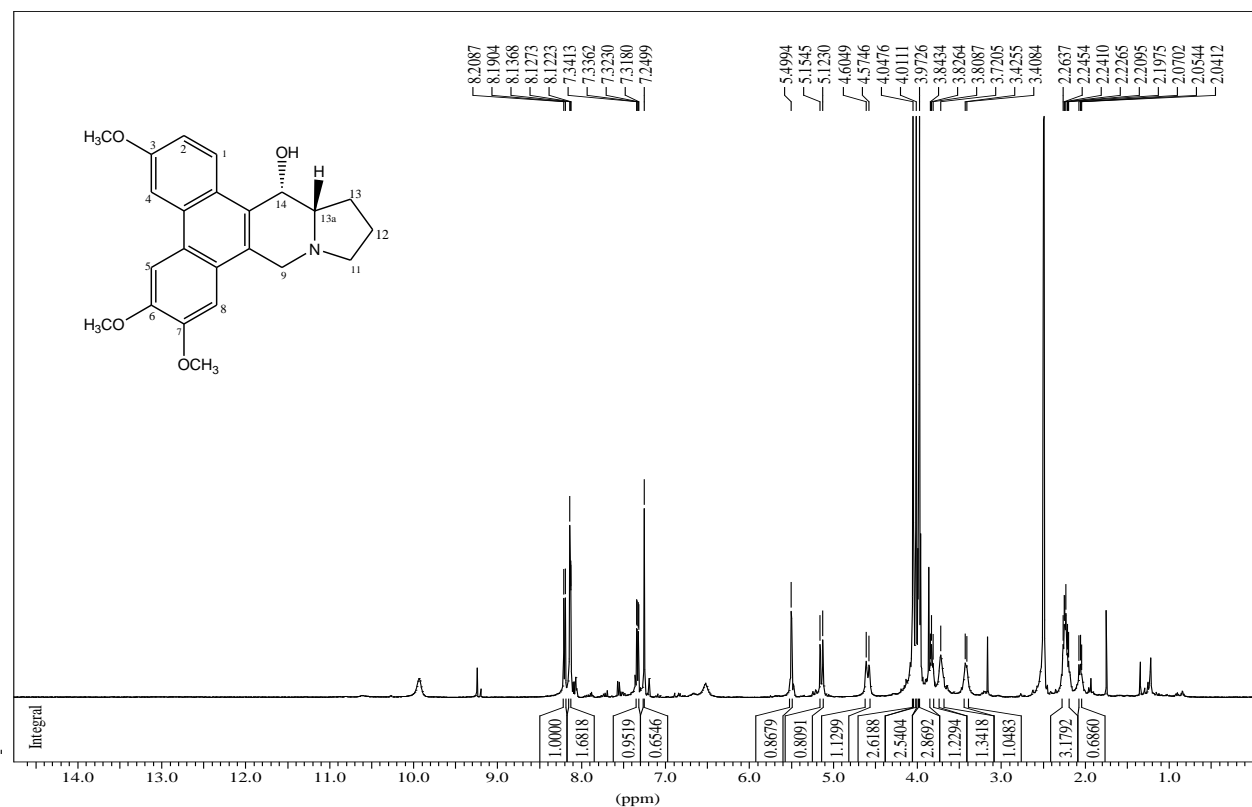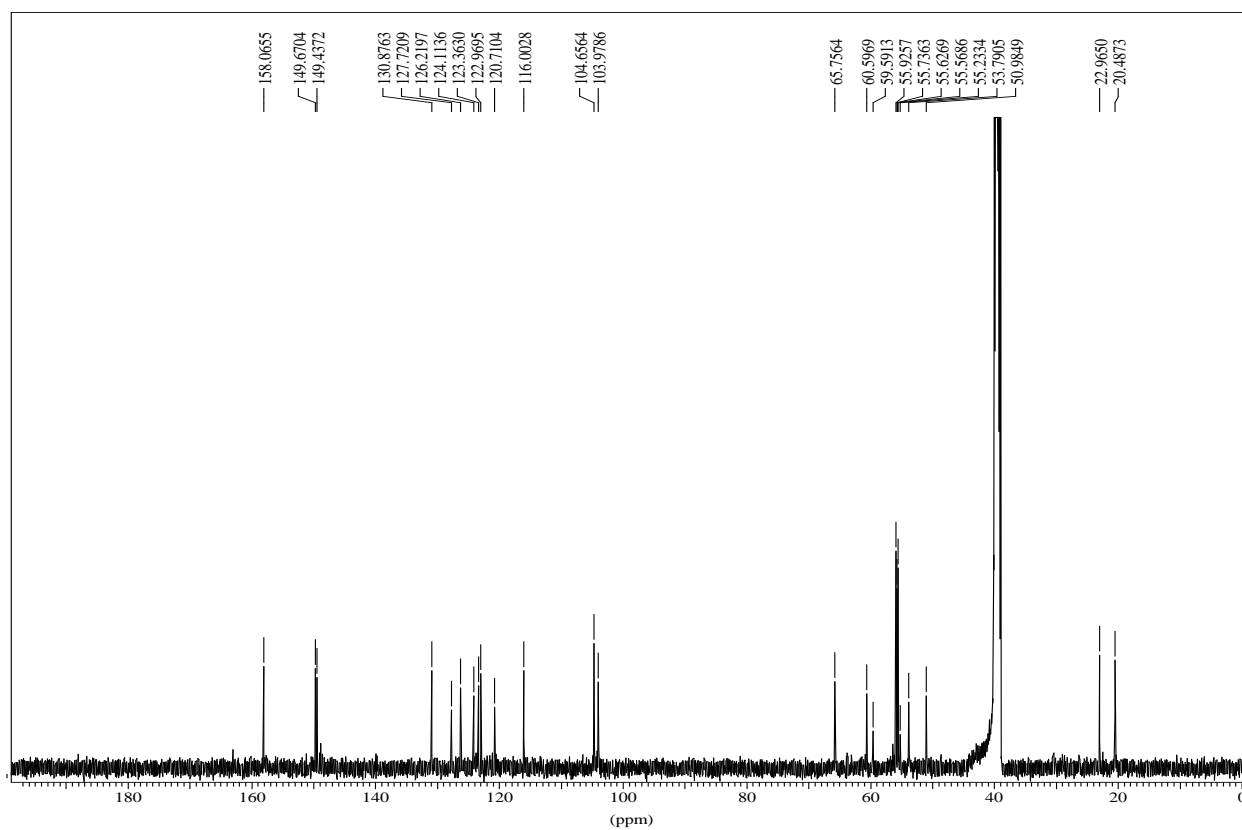

**<sup>13</sup>C-NMR spectrum, (DMSO-*d*<sub>6</sub>, 100 MHz)**

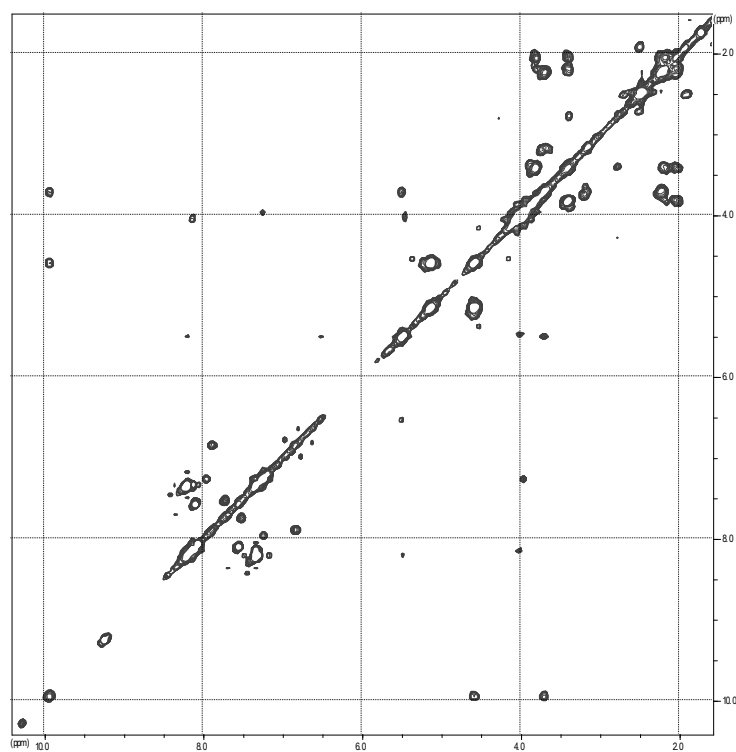

**2D- $^1\text{H}$ ,  $^1\text{H}$ -COSY spectrum, (DMSO- $d_6$ , 500 MHz)**

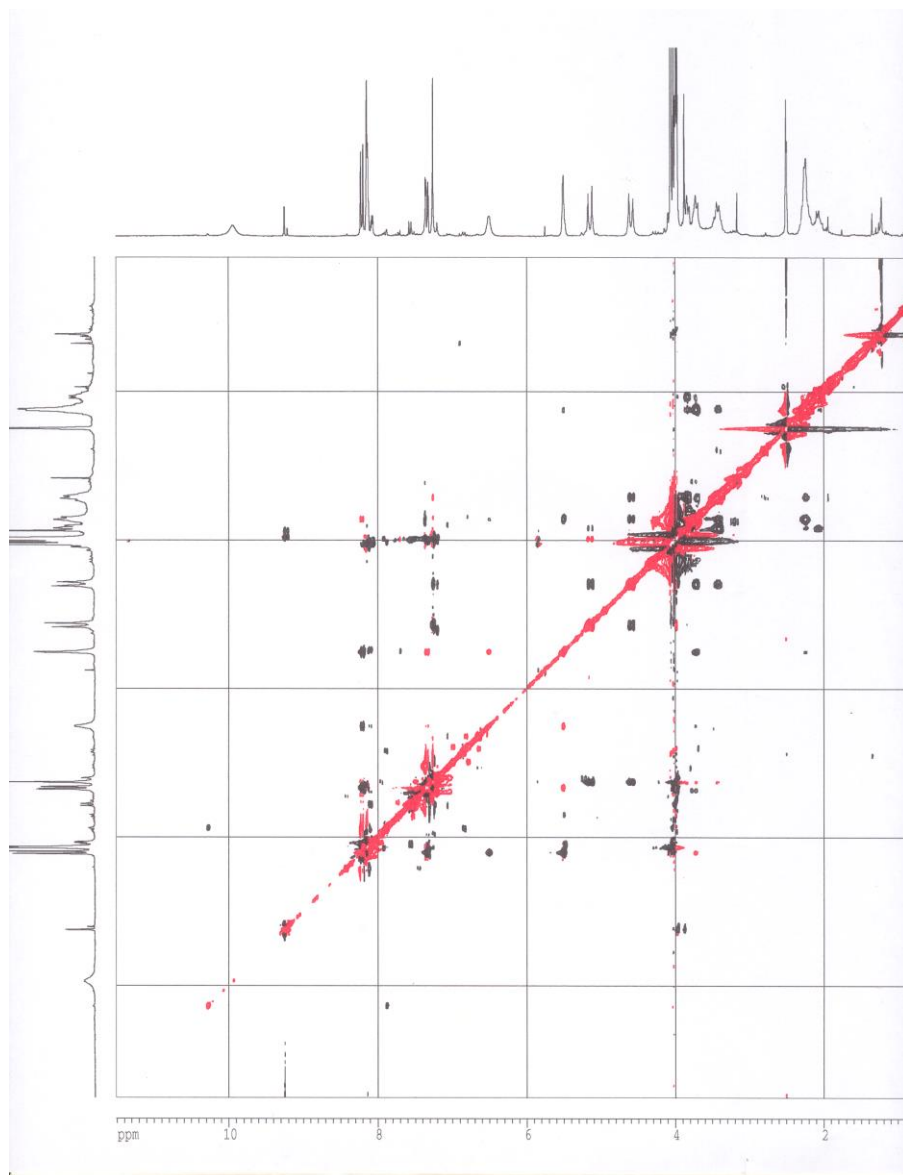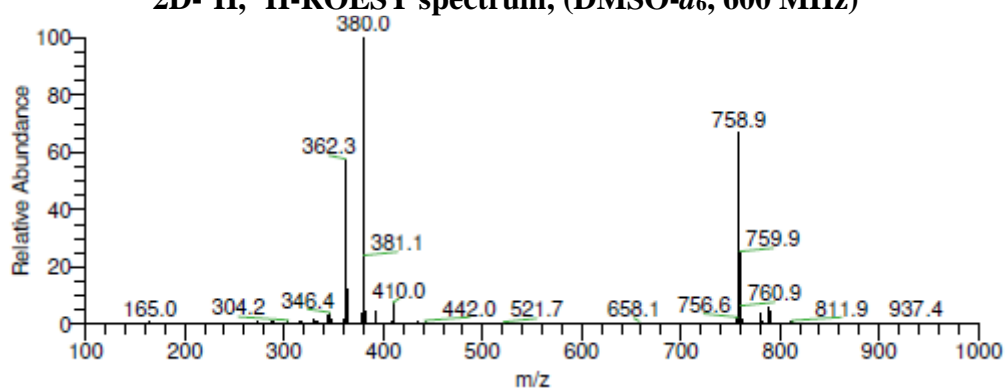



## Compound 4: (+)-Tylophorinine *N*-Oxide

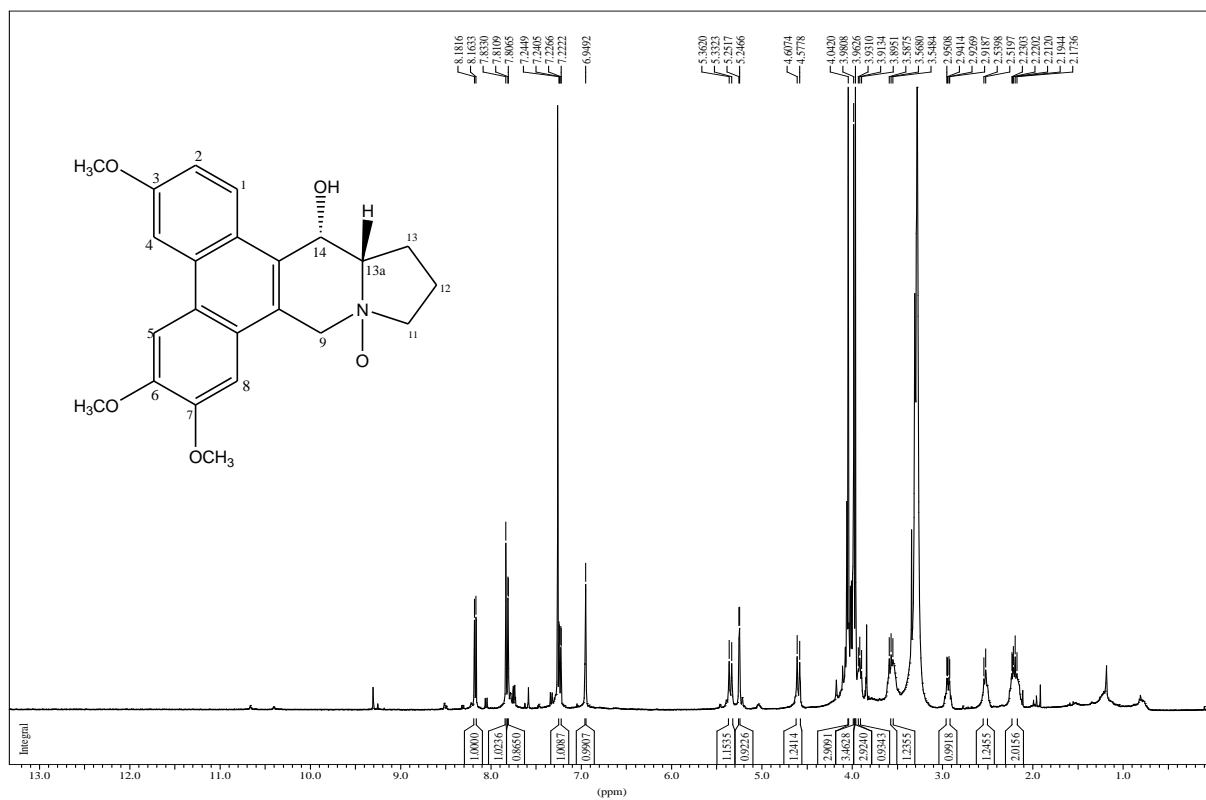

<sup>1</sup>H-NMR spectrum, (CDCl<sub>3</sub>:CD<sub>3</sub>OD, 500 MHz)

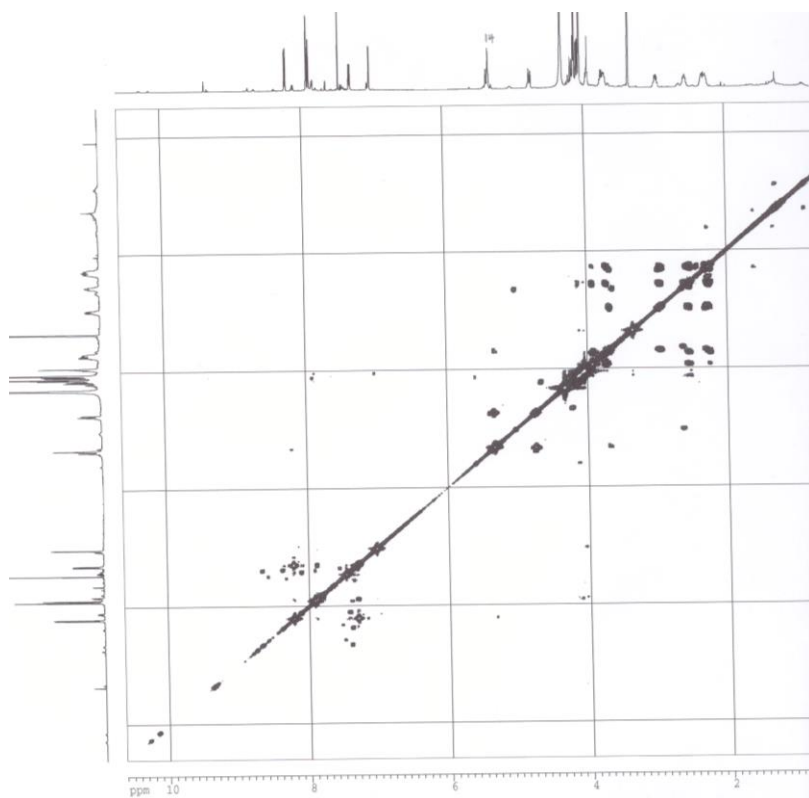

2D-<sup>1</sup>H, <sup>1</sup>H-COSY spectrum, (CDCl<sub>3</sub>:CD<sub>3</sub>OD, 500 MHz)

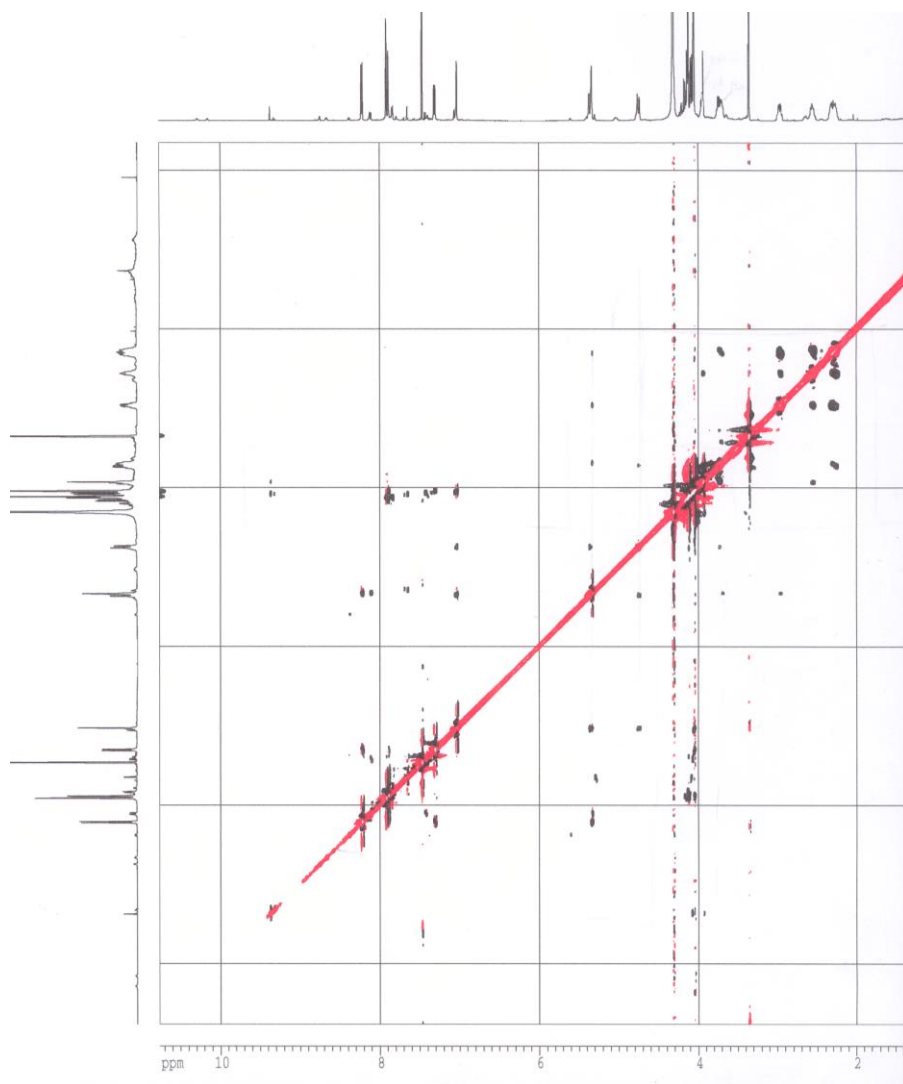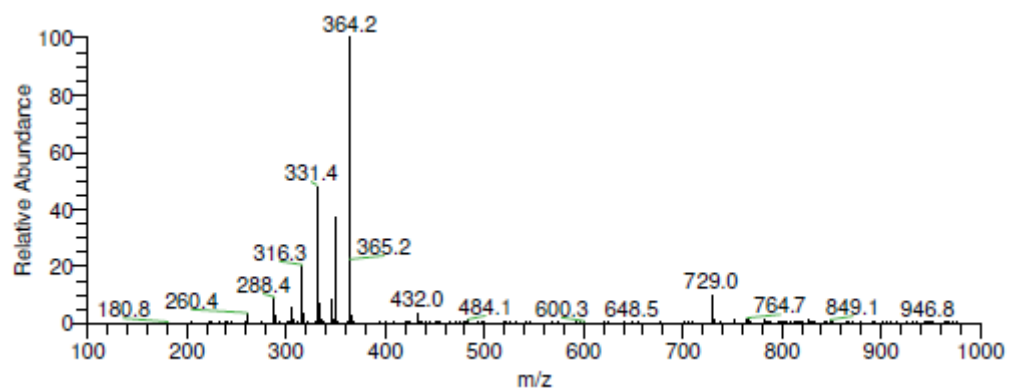

LC-ESI-MS

## Compound 5: (+)-Tylophorinidine

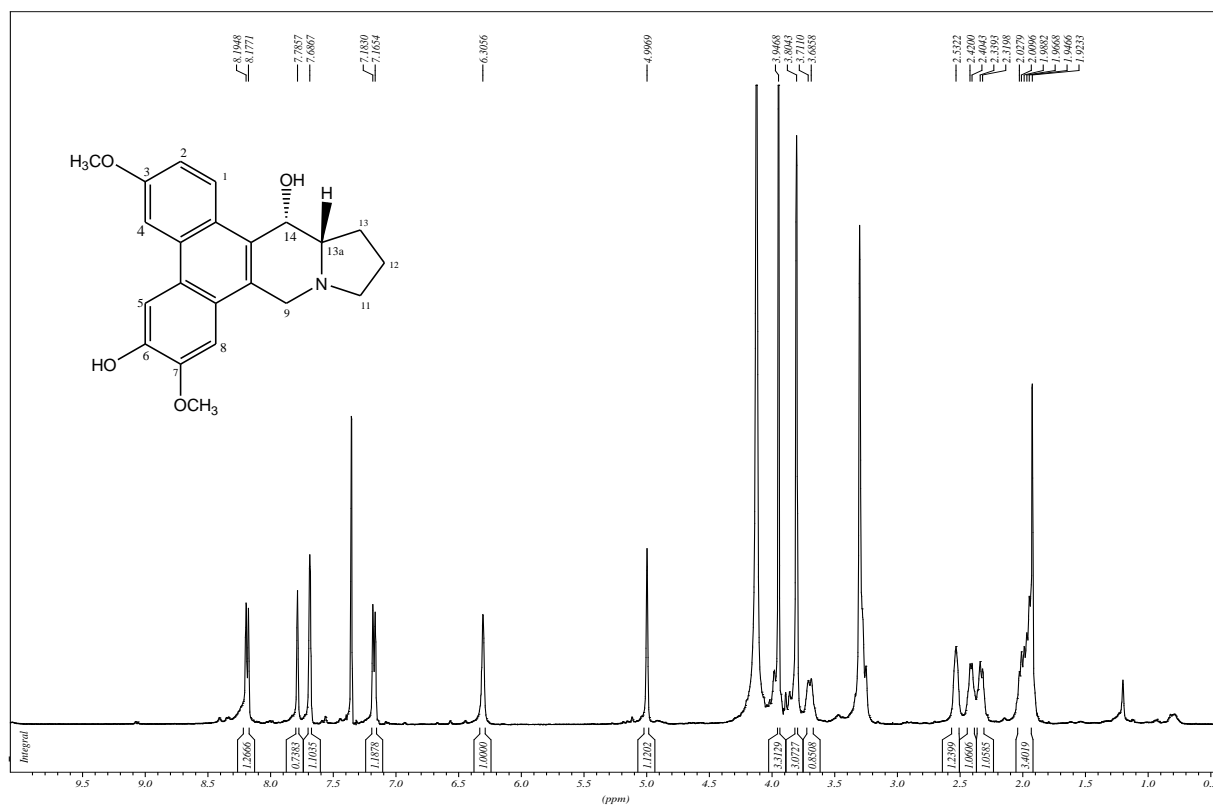

**<sup>1</sup>H-NMR spectrum, (CDCl<sub>3</sub>:CD<sub>3</sub>OD, 500 MHz)**

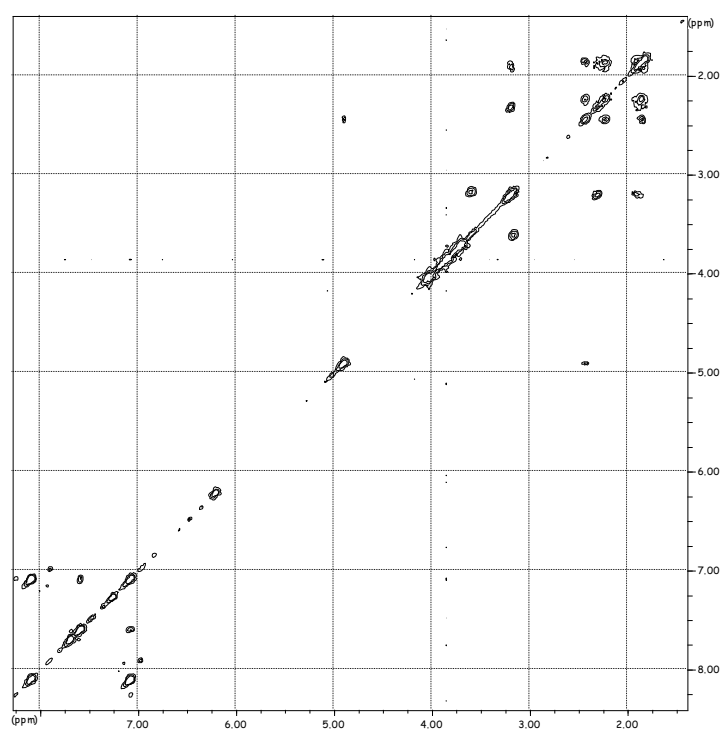

**2D-<sup>1</sup>H, <sup>1</sup>H-COSY spectrum, (CDCl<sub>3</sub>:CD<sub>3</sub>OD, 500 MHz)**

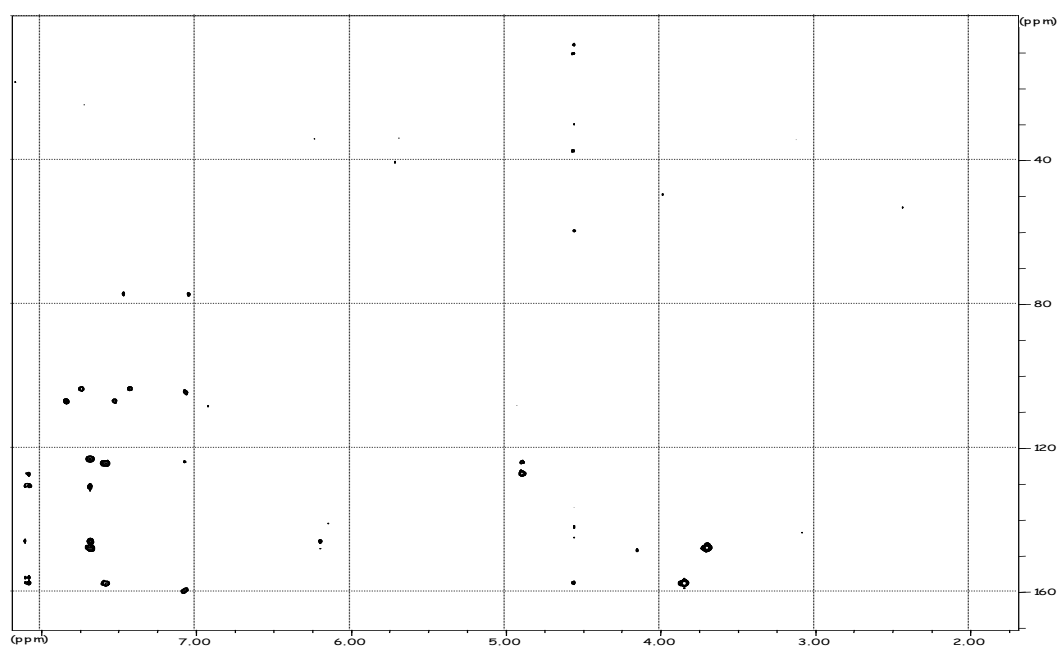

**HMBC spectrum, ( $\text{CDCl}_3:\text{CD}_3\text{OD}$ , 500 MHz)**

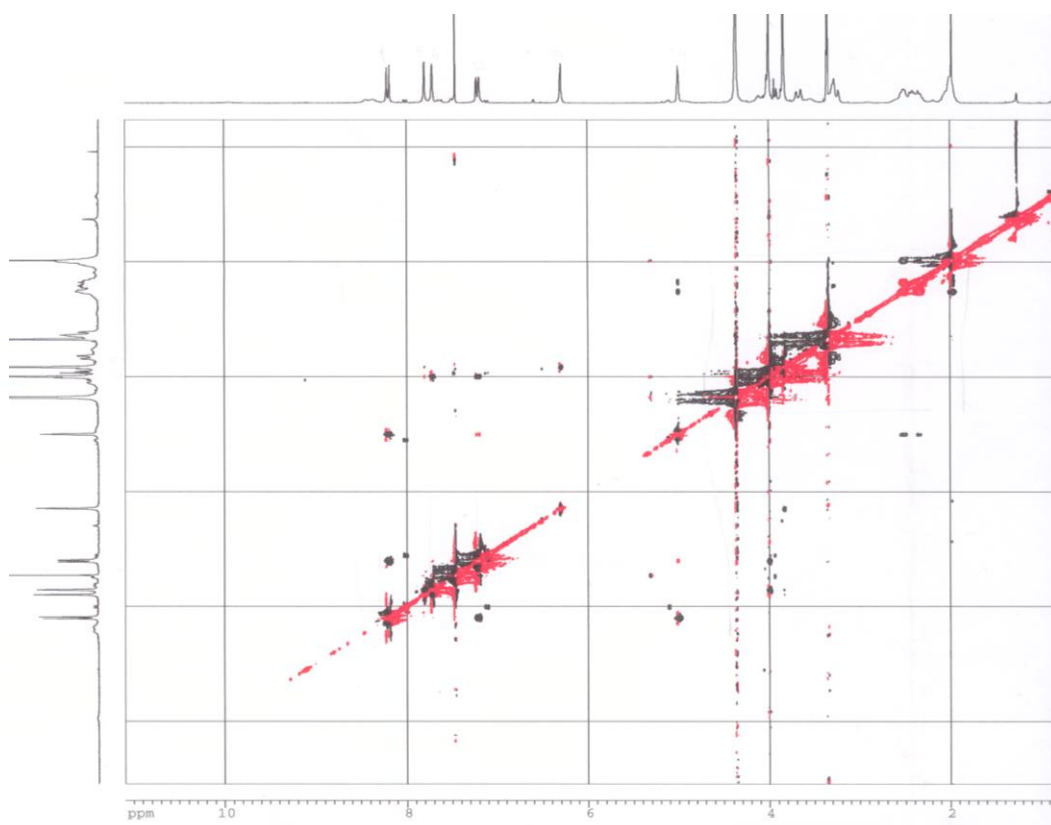

**2D- $^1\text{H}$ ,  $^1\text{H}$ -ROESY spectrum, ( $\text{CDCl}_3:\text{CD}_3\text{OD}$ , 600 MHz)**

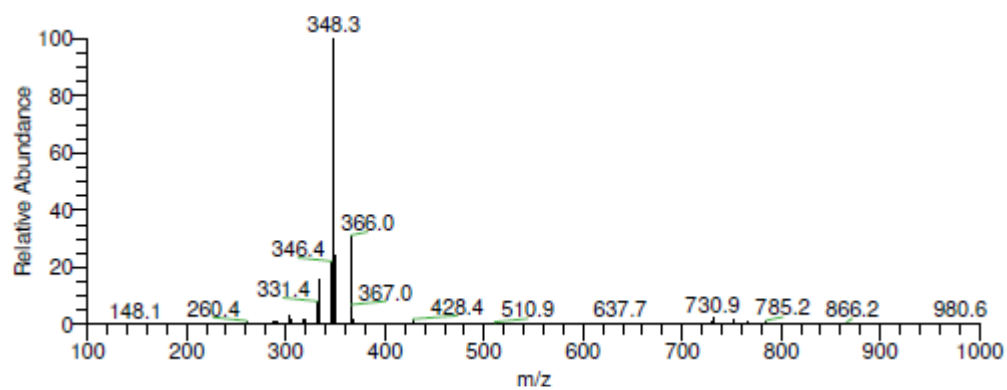

LC-ESI-MS

### Compound 6: (+)-Tylophorinidine *N*-Oxide

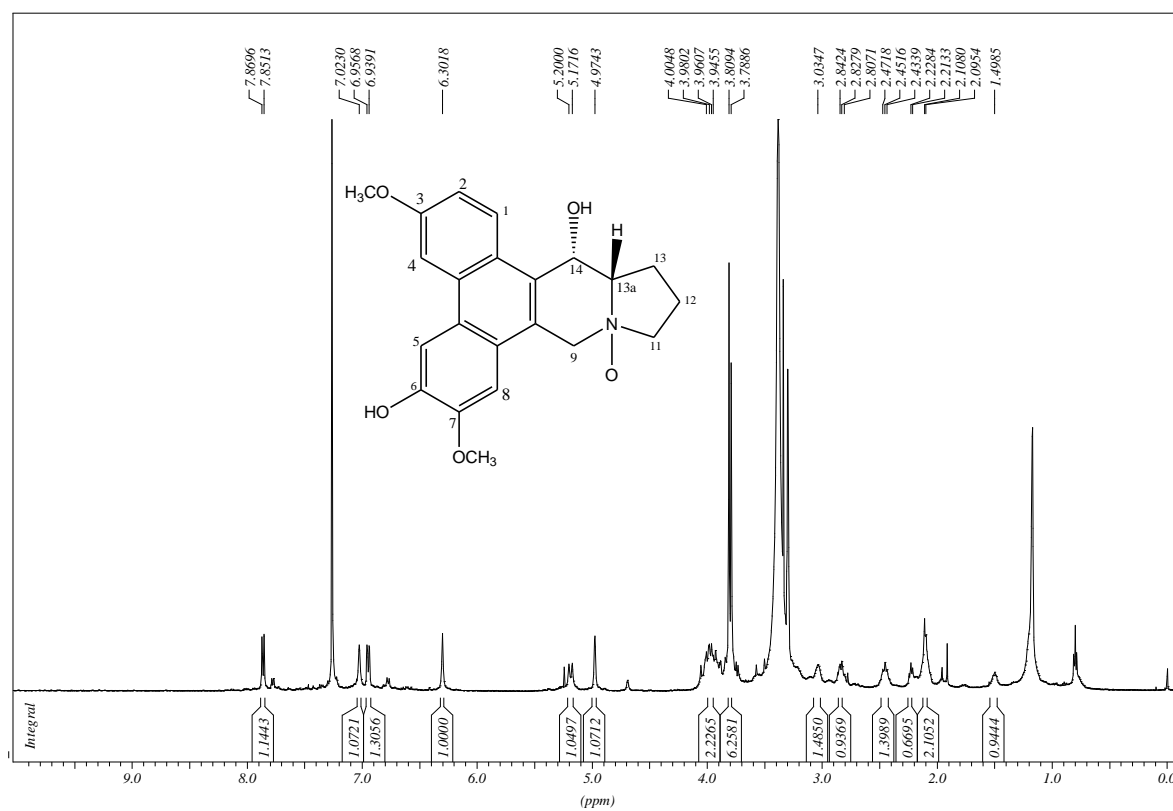

<sup>1</sup>H-NMR spectrum, (CDCl<sub>3</sub>:CD<sub>3</sub>OD, 500 MHz)

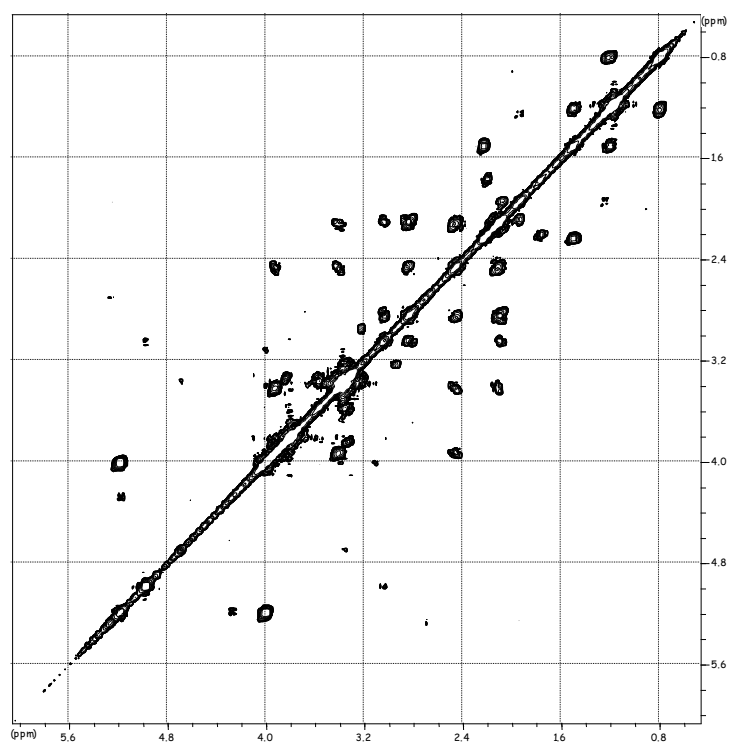

**2D-<sup>1</sup>H, <sup>1</sup>H-COSY spectrum, (CDCl<sub>3</sub>:CD<sub>3</sub>OD, 500 MHz)**

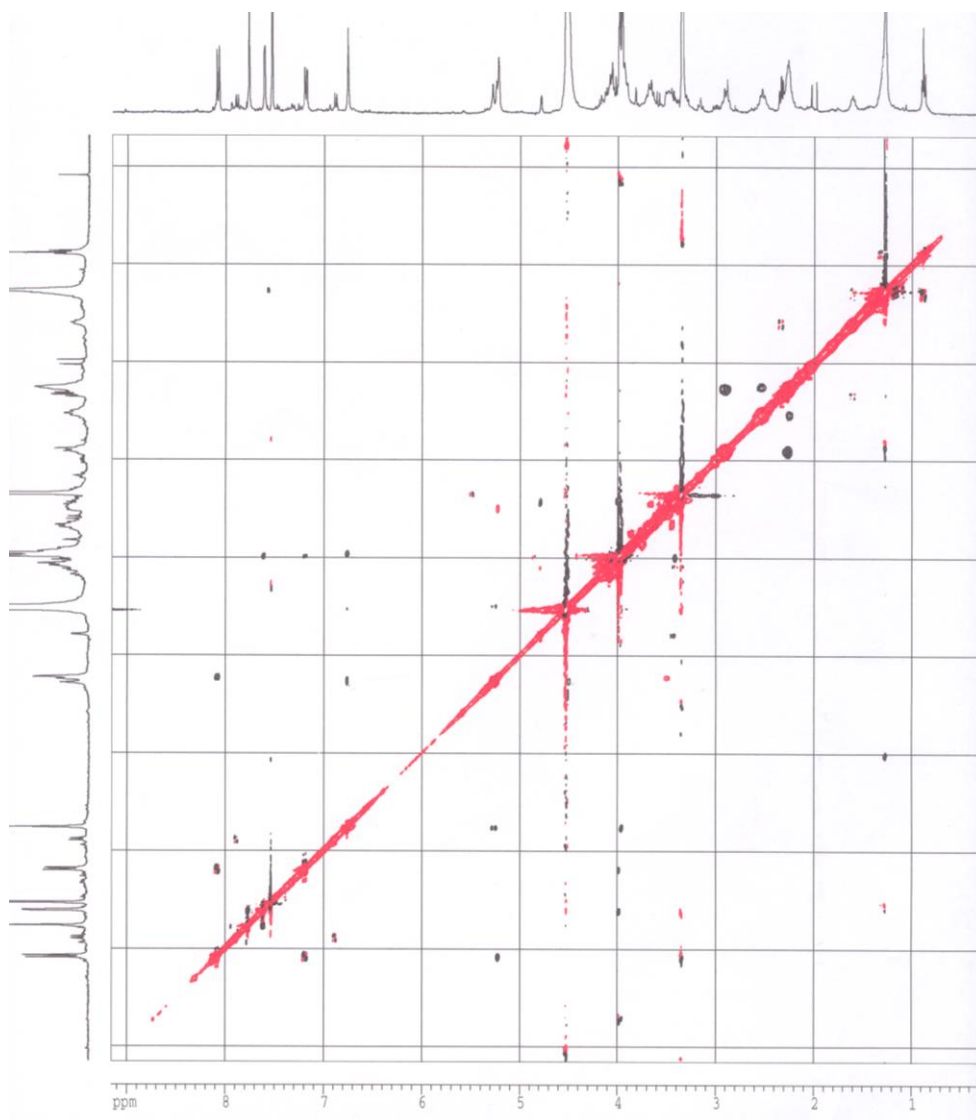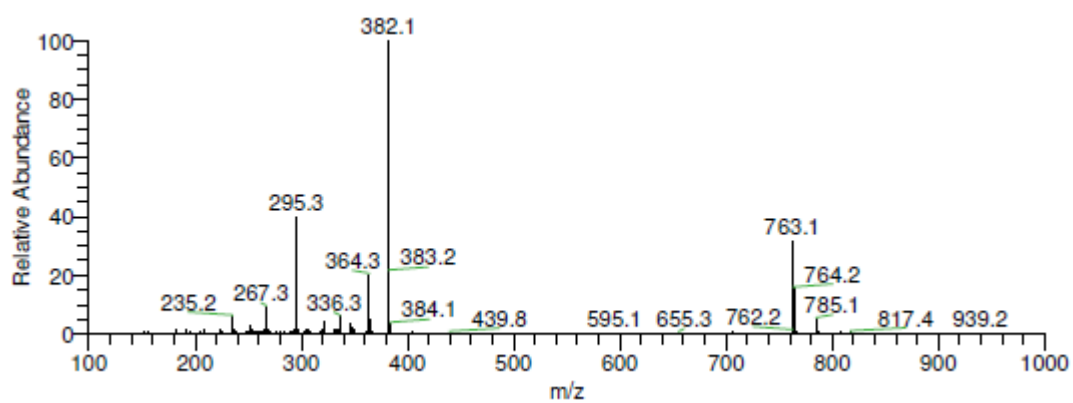

LC-ESI-MS

## Compound 7: (+)-Septicine

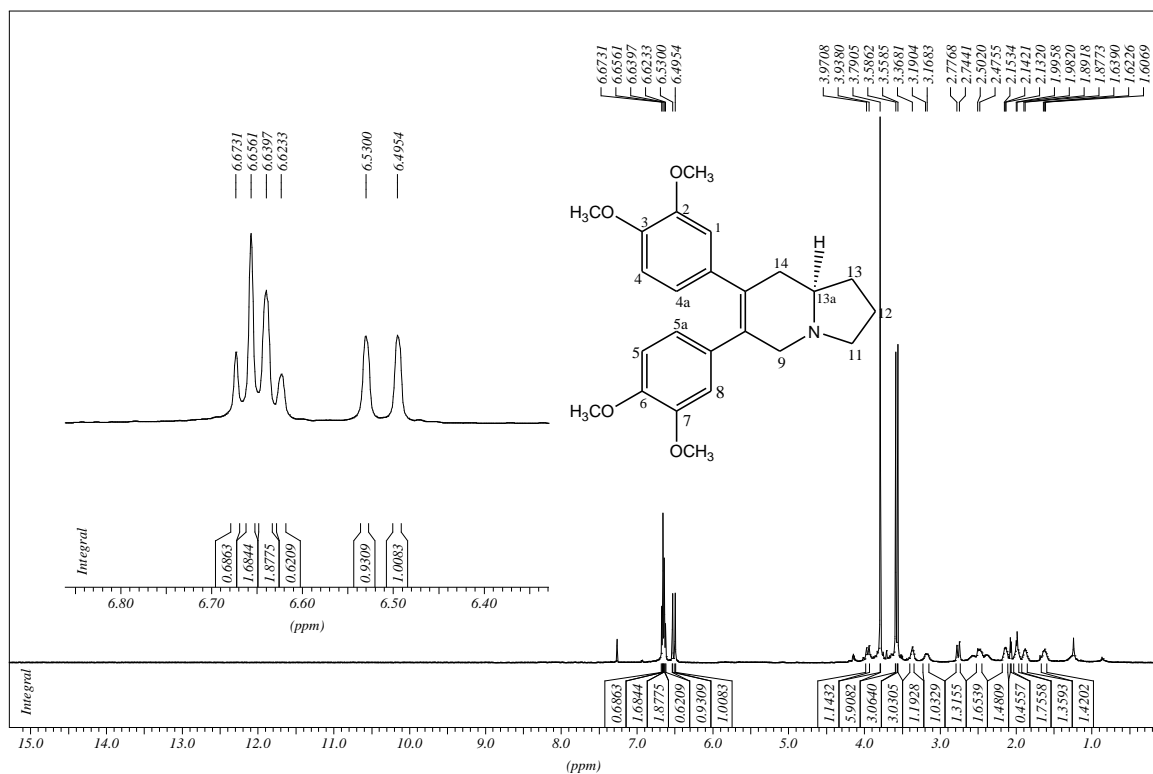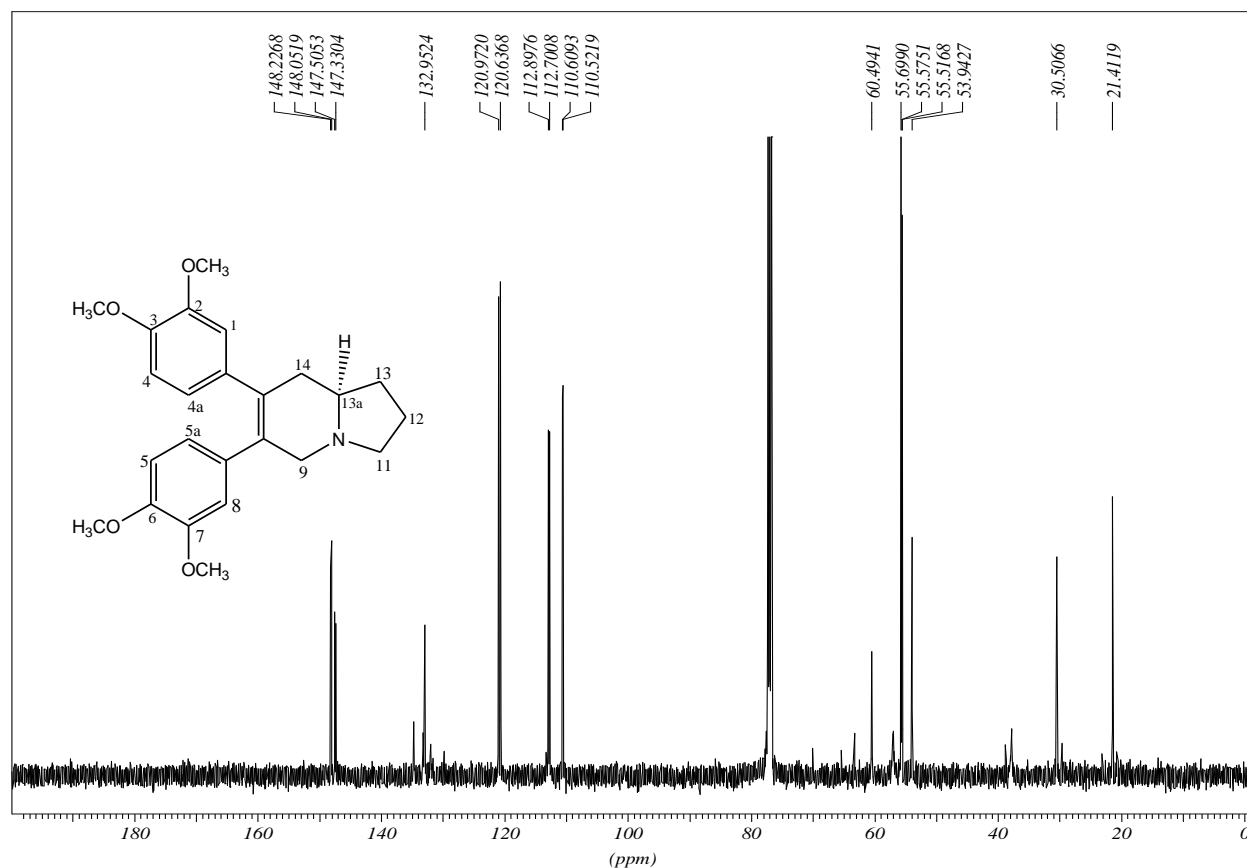

**<sup>13</sup>C-NMR spectrum, (CDCl<sub>3</sub>, 500 MHz)**



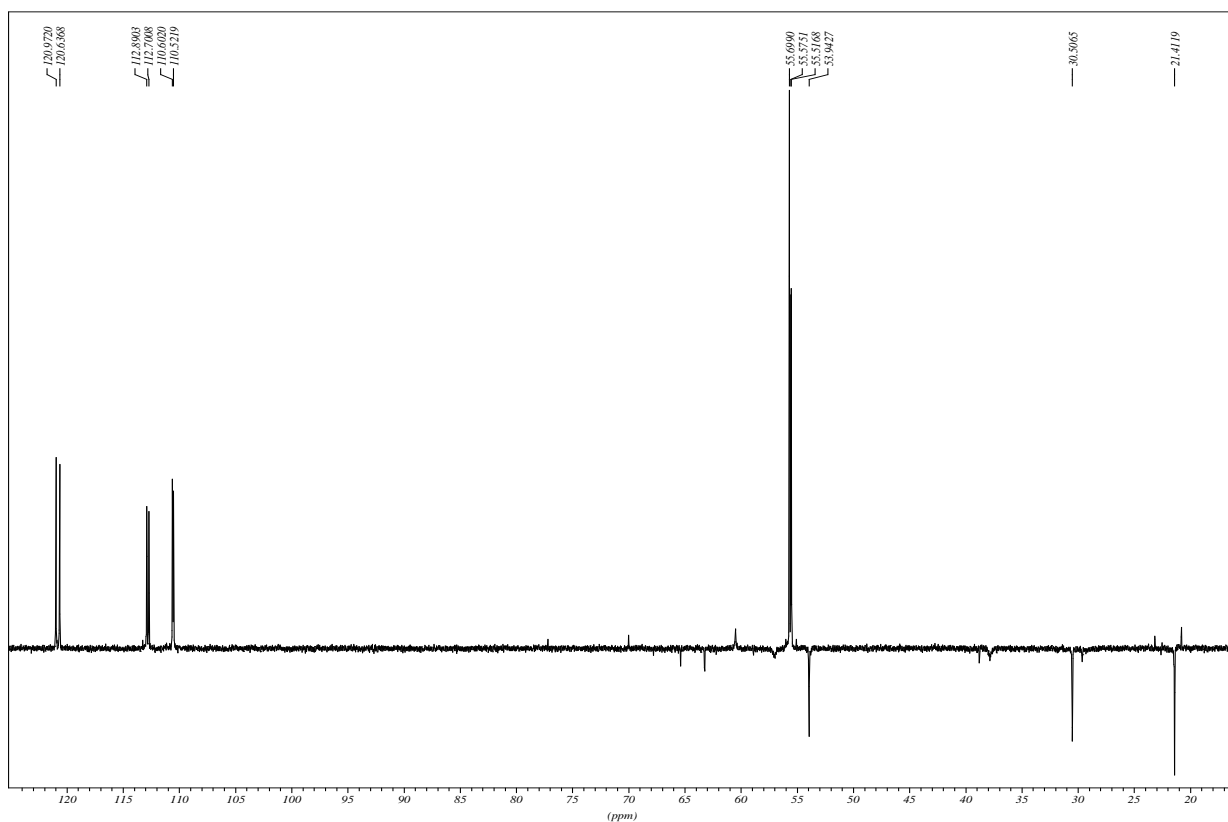

**$^{13}\text{C}$ -DEPT-NMR spectrum, ( $\text{CDCl}_3$ , 500 MHz)**

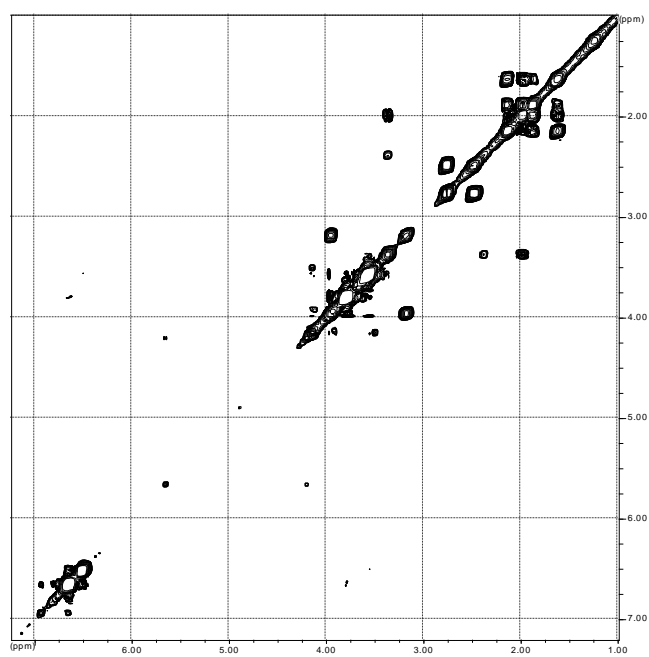

**$2\text{D-}^1\text{H-}^1\text{H}$ -COSY spectrum, ( $\text{CDCl}_3$ , 500 MHz)**

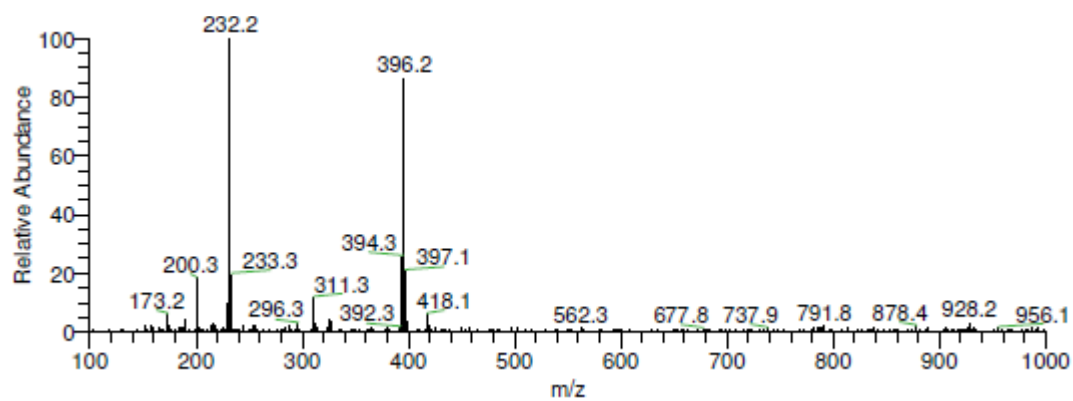

LC-ESI-MS

## Compound 8: Chlorogenic acid

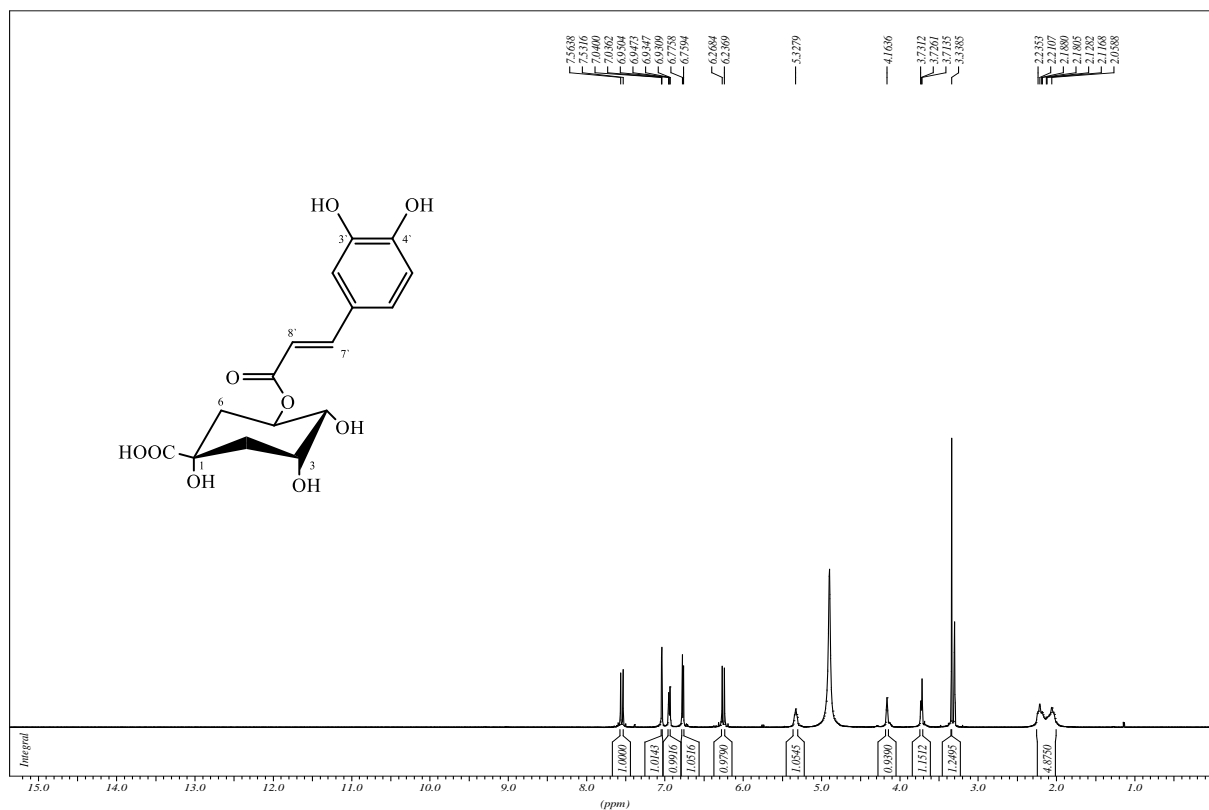

<sup>1</sup>H-NMR spectrum, (CD<sub>3</sub>OD, 500 MHz)

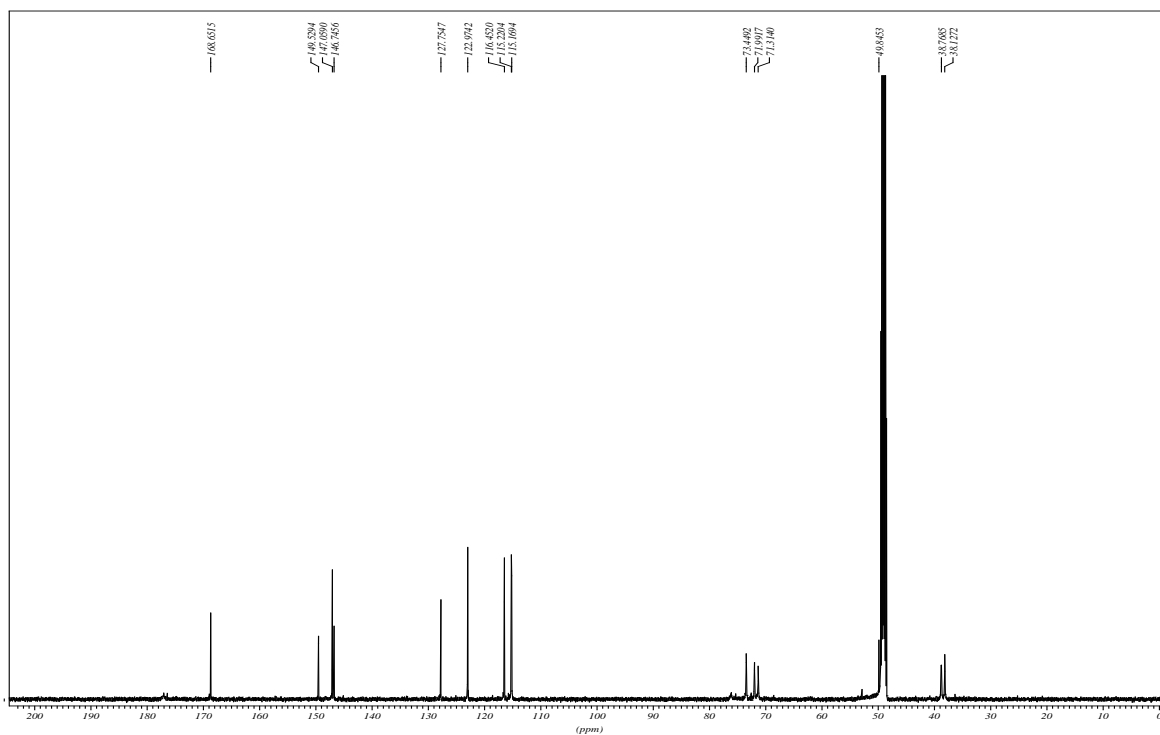

$^{13}\text{C}$ -NMR spectrum, ( $\text{CD}_3\text{OD}$ , 500 MHz)

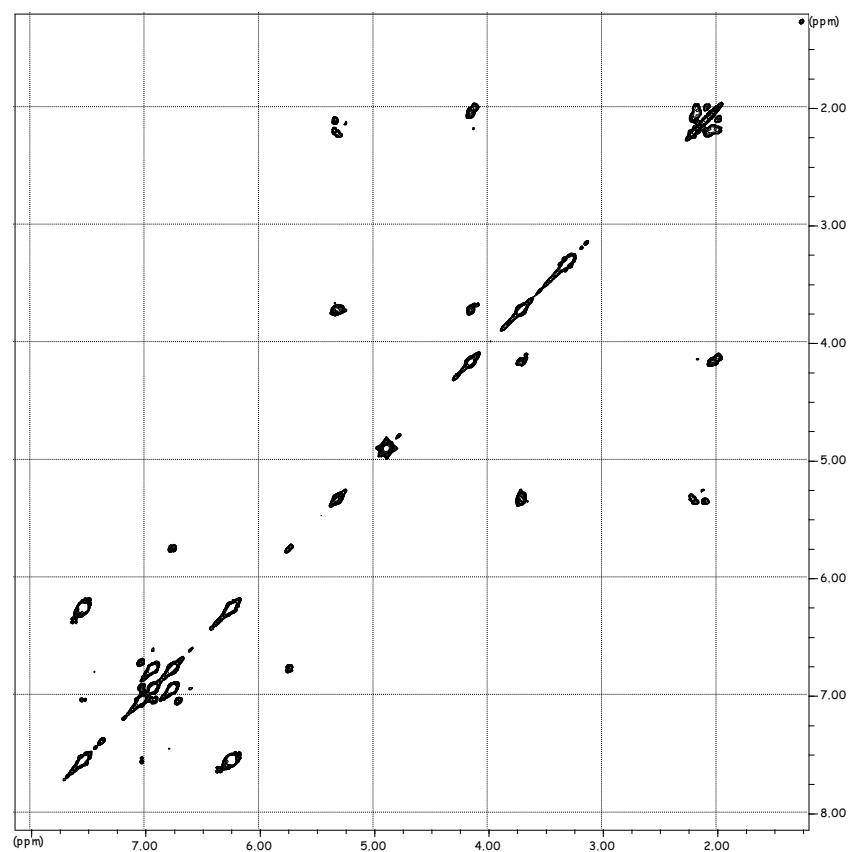

2D- $^1\text{H}$ - $^1\text{H}$ -COSY spectrum, ( $\text{CD}_3\text{OD}$ , 500 MHz)

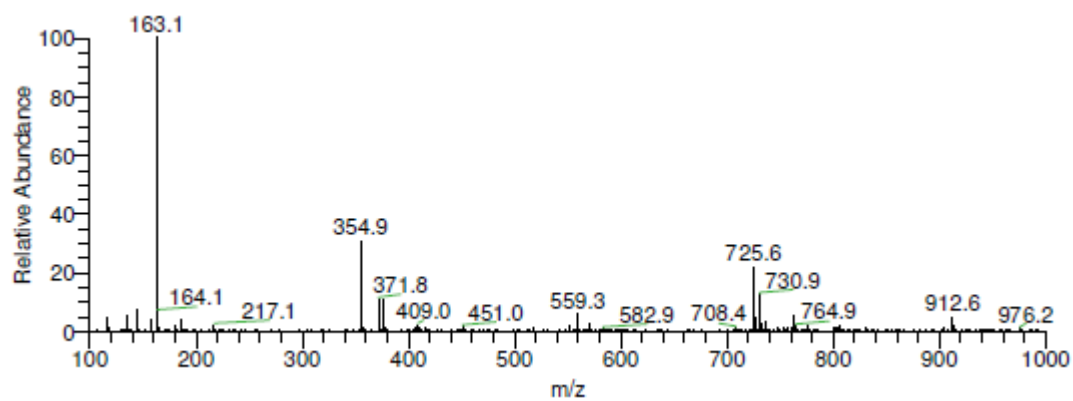

### LC-ESI-MS

### Compound 9: Chlorogenic acid methyl ester

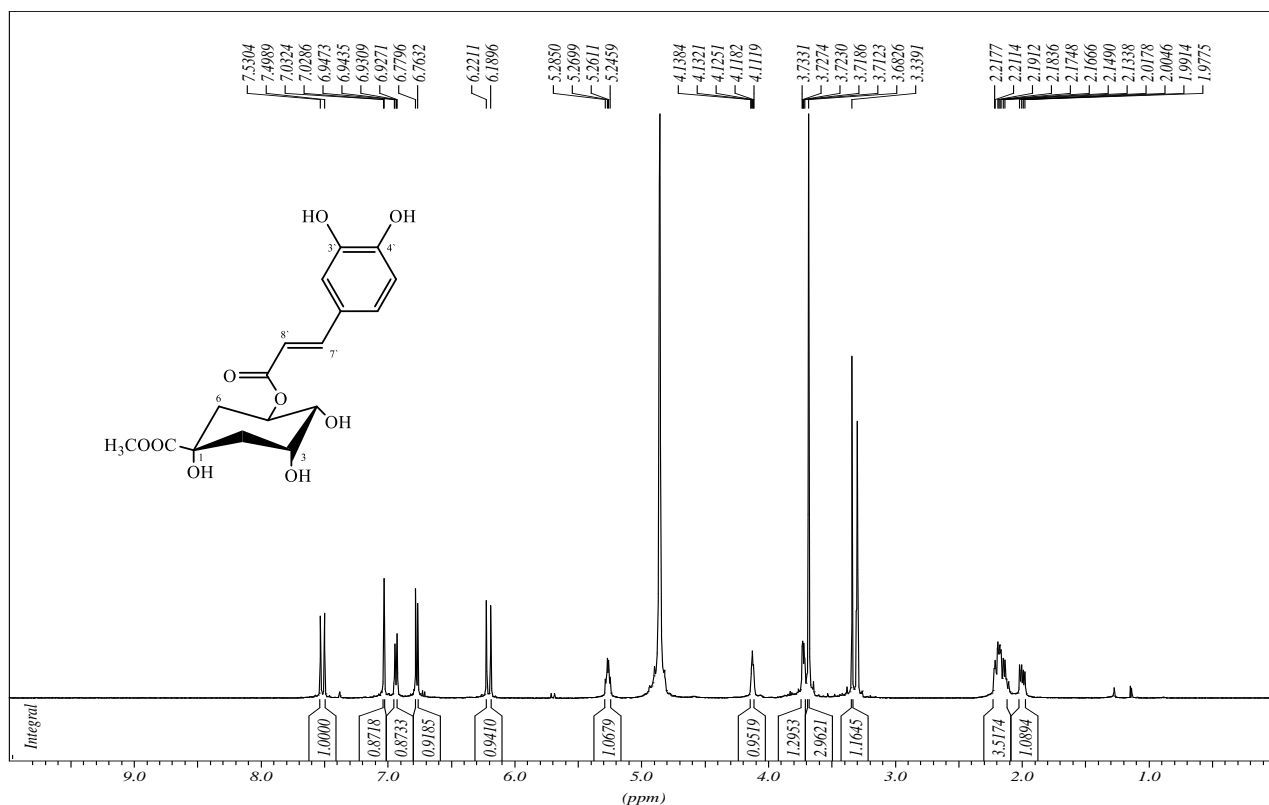

<sup>1</sup>H-NMR spectrum, (CD<sub>3</sub>OD, 500 MHz)

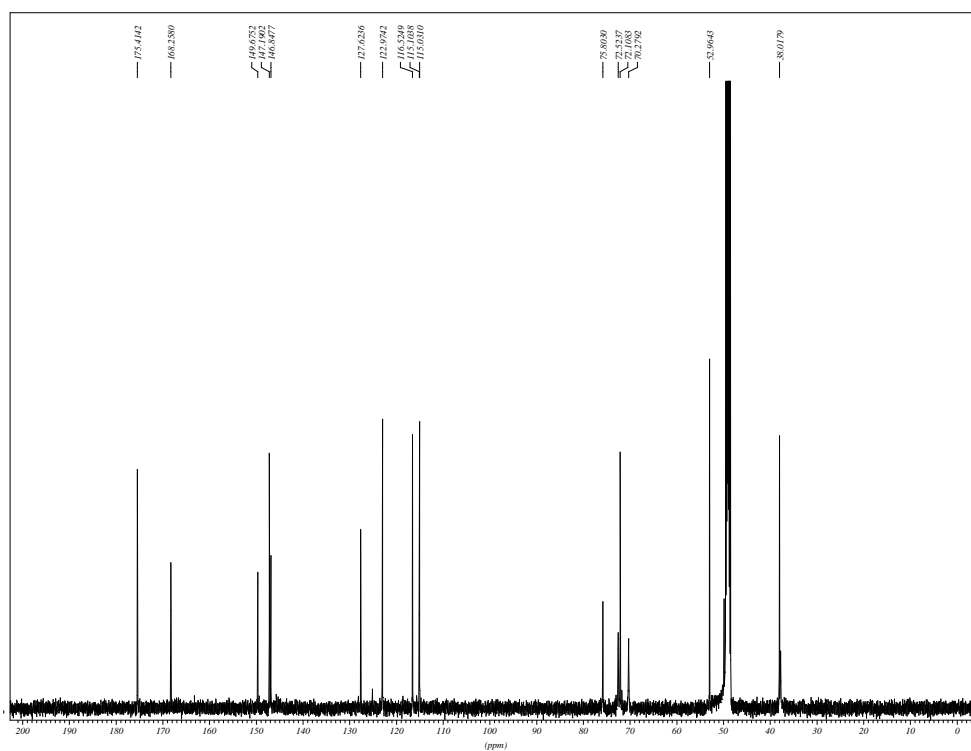

**$^{13}\text{C}$ -NMR spectrum, ( $\text{CD}_3\text{OD}$ , 500 MHz)**

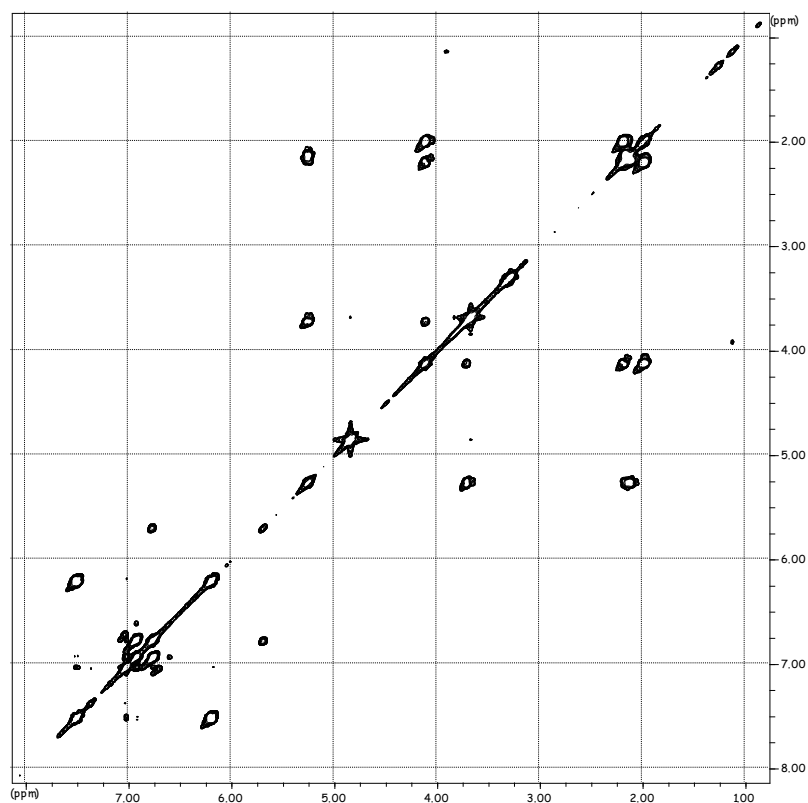

**2D- $^1\text{H}$ - $^1\text{H}$ -COSY spectrum, ( $\text{CD}_3\text{OD}$ , 500 MHz)**

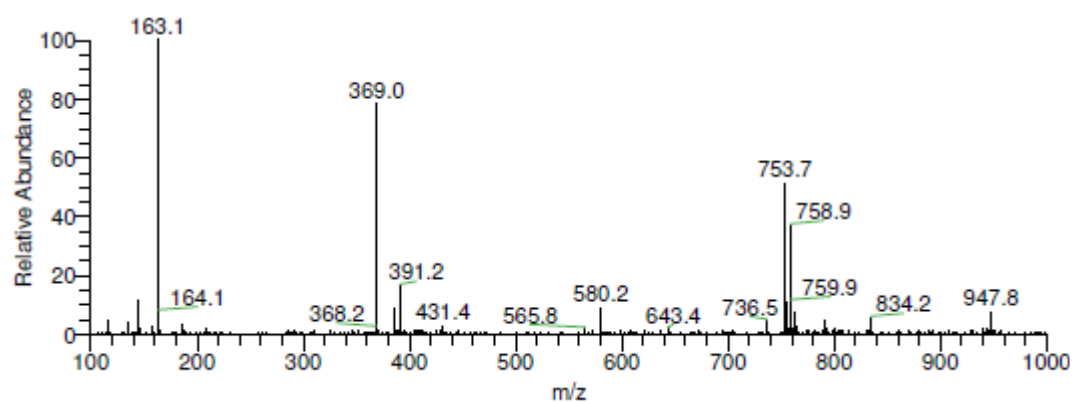

LC-ESI-MS
